# Supplementary material
Source: PubMed Central journal article supplement (PMC2715005)
Supplement: mmc1.pdf [file mmc1.pdf]

# THE LANCET

## Supplementary webappendix

This webappendix formed part of the original submission and has been peer reviewed. We post it as supplied by the authors.

Supplement to: Antithrombotic Trialists' (ATT) Collaboration. Aspirin in the primary and secondary prevention of vascular disease: collaborative meta-analysis of individual participant data from randomised trials. *Lancet* 2009; **373**: 1849–60.

**Webappendix for “Aspirin in the primary and secondary prevention of vascular disease: collaborative meta-analysis of individual participant data from randomised trials”  
Lancet 2009; 373: 1849-60**

**A. Characteristics of the primary and secondary prevention trials\***

|                          |   |
|--------------------------|---|
| Baseline characteristics | 1 |
| Number of events         | 2 |

**B. Primary prevention trials only**

|                                                                                 |    |
|---------------------------------------------------------------------------------|----|
| Rate ratios associated with risk factors for selected outcomes                  | 3  |
| Major coronary events – subgroup analyses                                       | 4  |
| Major coronary events, by study                                                 | 5  |
| Stroke subtypes (first stroke only), by study                                   | 6  |
| Probably ischaemic stroke – subgroup analyses                                   | 7  |
| First stroke (any type) – subgroup analyses                                     | 8  |
| Gastro-intestinal bleed (or other major extracranial bleed), by study           | 9  |
| Gastro-intestinal bleed (or other major extracranial bleed) – subgroup analyses | 10 |

**C. Secondary prevention trials only\***

|                                                                       |    |
|-----------------------------------------------------------------------|----|
| Serious vascular events, by study                                     | 11 |
| Non-fatal acute myocardial infarction, by study                       | 12 |
| CHD death, by study                                                   | 13 |
| Major coronary events, by study                                       | 14 |
| Haemorrhagic stroke, by study                                         | 15 |
| Definitely ischaemic stroke, by study                                 | 16 |
| Probably ischaemic stroke, by study                                   | 17 |
| Any stroke, by study                                                  | 18 |
| Vascular death, by study                                              | 19 |
| Gastro-intestinal bleed (or other major extracranial bleed), by study | 20 |

**D. Primary and secondary prevention trials\***

|                                                            |       |
|------------------------------------------------------------|-------|
| Serious vascular events, and numbers of patients, by study | 21    |
| References                                                 | 22-23 |
| Statistical Appendix                                       | 24    |

\* For some secondary prevention trials, the numbers of events have been updated slightly from those published previously (BMJ 1994; BMJ 2002). Specifically, the current report includes an additional 5 vs 8 (aspirin vs adjusted control) non-fatal myocardial infarctions, 13 vs 18 non-fatal strokes, 16 vs 26 serious vascular events (AICLA [0 vs 2], AMIS [3 vs 2], Canadian Co-op [1 vs 0] and UKTIA [12 vs 11x2]), and 2 vs 1 major extracranial bleeds (Britton [0 vs 1] and UKTIA [2 vs 0]). (Two aspirin-allocated patients had both a non-fatal MI and a non-fatal stroke.) These events were previously omitted from the 2002 report because an earlier definition (BMJ 1994) of a non-fatal event was applied in error. None of these minor changes affect the conclusions of previous reports.

**Web Table 1: Baseline characteristics of the primary and secondary prevention trials**

|                                                      | Number of participants | Male       | Age, years     | Blood pressure (SBP/DBP), mmHg | Total cholesterol, mmol/L | Current smokers | Body mass index, kg/m <sup>2</sup> | Diabetes mellitus | Hypertension | Any vascular disease |
|------------------------------------------------------|------------------------|------------|----------------|--------------------------------|---------------------------|-----------------|------------------------------------|-------------------|--------------|----------------------|
| <b>Primary prevention trials</b>                     |                        |            |                |                                |                           |                 |                                    |                   |              |                      |
| British Doctors Study                                | 5139                   | 100%       | 61 (7)         | 136 (17) / 83 (10)             | -                         | 31%             | 24.4 (2.5)                         | 2%                | 10%          | 8%                   |
| US Physicians Health Study                           | 22071                  | 100%       | 53 (10)        | 126 (12) / 79 (8)              | 5.5 (1.2)                 | 11%             | 24.9 (3.0)                         | 2%                | 24%          | 1%                   |
| Thrombosis Prevention Trial                          | 5085                   | 100%       | 57 (7)         | 139 (18) / 83 (10)             | 6.4 (1.0)                 | 41%             | 27.4 (3.6)                         | 2%                | 16%          | <1%                  |
| Hypertension Optimal Treatment Trial                 | 18790                  | 53%        | 61 (7)         | 170 (14) / 105 (3)             | 6.0 (1.1)                 | 16%             | 28.4 (4.7)                         | 8%                | 100%         | 3%                   |
| Primary Prevention Project                           | 4495                   | 43%        | 64 (8)         | 145 (16) / 85 (8)              | 6.1 (1.2)                 | 15%             | 27.6 (4.7)                         | 17%               | 68%          | 4%                   |
| Women's Health Study                                 | 39876                  | 0%         | 54 (7)         | 124 (13) / 77 (8)*             | 5.2 (1.0)*                | 13%             | 26.0 (5.1)                         | 3%                | 26%          | <1%                  |
| <b>Subtotal: 6 trials</b>                            | <b>95456</b>           | <b>46%</b> | <b>56 (9)</b>  | <b>136 (22) / 84 (13)</b>      | <b>5.6 (1.1)</b>          | <b>16%</b>      | <b>26.3 (4.6)</b>                  | <b>4%</b>         | <b>41%</b>   | <b>2%</b>            |
| <b>Secondary prevention post-MI trials</b>           |                        |            |                |                                |                           |                 |                                    |                   |              |                      |
| Cardiff-I                                            | 1239                   | 100%       | 55 (8)         | -                              | -                         | -               | -                                  | -                 | -            | 100%                 |
| Cardiff-II                                           | 1725                   | 85%        | 56 (10)        | 143 (29) / 90 (18)             | -                         | -               | -                                  | 5%                | -            | 100%                 |
| PARIS-I                                              | 1216                   | 87%        | 56 (8)         | 132 (18) / 83 (9)              | -                         | -               | -                                  | 10%               | -            | 100%                 |
| AMIS                                                 | 4524                   | 89%        | 55 (8)         | 128 (16) / 80 (9)              | -                         | -               | -                                  | 11%               | -            | 100%                 |
| CDP-A                                                | 1529                   | 100%       | 56 (7)         | 132 (18) / 81 (10)             | -                         | -               | -                                  | 14%               | -            | 100%                 |
| Gamis                                                | 626                    | 78%        | 59 (7)         | -                              | -                         | -               | -                                  | 20%               | 19%          | 100%                 |
| <b>Subtotal: 6 trials</b>                            | <b>10859</b>           | <b>90%</b> | <b>56 (8)</b>  | <b>132 (21) / 82 (12)</b>      | <b>-</b>                  | <b>-</b>        | <b>-</b>                           | <b>11%</b>        | <b>19%</b>   | <b>100%</b>          |
| <b>Secondary prevention post TIA / stroke trials</b> |                        |            |                |                                |                           |                 |                                    |                   |              |                      |
| AITIA                                                | 319                    | 70%        | 58 (14)        | -                              | -                         | -               | -                                  | -                 | -            | 100%                 |
| UK-TIA                                               | 2435                   | 73%        | 60 (9)         | 151 (25) / 88 (12)             | -                         | -               | -                                  | 4%                | 27%          | 100%                 |
| Reuther                                              | 60                     | 65%        | 58 (10)        | -                              | -                         | -               | -                                  | 17%               | 50%          | 100%                 |
| CA Co-op                                             | 283                    | 67%        | 61 (9)         | 146 (23) / 85 (11)             | -                         | -               | -                                  | 8%                | 37%          | 100%                 |
| Toulouse TIA                                         | 303                    | 86%        | 63 (9)         | -                              | -                         | -               | -                                  | -                 | -            | 100%                 |
| AICLA                                                | 402                    | 68%        | 64 (10)        | 150 (21) / 90 (12)             | -                         | -               | -                                  | 23%               | 64%          | 100%                 |
| Danish Co-op                                         | 203                    | 73%        | 59 (9)         | 138 (22) / 84 (12)             | -                         | -               | -                                  | 6%                | -            | 100%                 |
| Britton                                              | 505                    | 62%        | 68 (10)        | -                              | -                         | -               | -                                  | 17%               | 46%          | 100%                 |
| Danish Low Dose                                      | 301                    | 65%        | 59 (8)         | 149 (23) / 85 (12)             | -                         | -               | -                                  | 7%                | -            | 100%                 |
| SALT                                                 | 1359                   | 66%        | 67 (7)         | -                              | -                         | -               | -                                  | 13%               | 47%          | 100%                 |
| <b>Subtotal: 10 trials</b>                           | <b>6170</b>            | <b>70%</b> | <b>62 (10)</b> | <b>149 (24) / 87 (12)</b>      | <b>-</b>                  | <b>-</b>        | <b>-</b>                           | <b>9%</b>         | <b>38%</b>   | <b>100%</b>          |

- = Not available, MI = myocardial infarction, TIA = transient ischaemic attack. \* In the Women's Health Study, individual blood pressure and cholesterol levels were imputed based on categories provided by the investigators (in 10 mmHg ranges for SBP, 5 mmHg ranges for DBP and 10 mg/dL [ $\sim$ 0.25 mmol/L] ranges for cholesterol). Continuous data are presented as mean (SD). Percentages are based on the proportions among those participants with data available. Some patients in the primary prevention trials were found, after randomisation, to have had vascular disease (i.e. prior history of myocardial infarction, cerebrovascular disease, angina pectoris, peripheral arterial disease or heart failure).

**Web Table 2: Number of events in the primary and secondary prevention trials**

| Trial                                                | Serious vascular event | Major coronary events | Non fatal myocardial infarction | Any stroke  | Stroke of unknown cause | Mortality  |            |                |                    |              |               |             | Major extracranial bleed | Fatal bleed |
|------------------------------------------------------|------------------------|-----------------------|---------------------------------|-------------|-------------------------|------------|------------|----------------|--------------------|--------------|---------------|-------------|--------------------------|-------------|
|                                                      |                        |                       |                                 |             |                         | CHD        | Stroke     | Other vascular | Any known vascular | Non vascular | Unknown cause | All causes  |                          |             |
| <b>Primary prevention trials</b>                     |                        |                       |                                 |             |                         |            |            |                |                    |              |               |             |                          |             |
| British Doctors Study (2:1†)                         | 434                    | 267                   | 149                             | 133         | 87                      | 136        | 42         | 46             | 224                | 194          | 3             | 421         | 30                       | 4           |
| US Physicians Health Study                           | 686                    | 459                   | 342                             | 219         | 10                      | 127        | 22         | 28             | 177                | 205          | 62            | 444         | 78                       | 2           |
| Thrombosis Prevention Trial                          | 468                    | 353                   | 233                             | 100         | 22                      | 141        | 25         | 28             | 194                | 197          | 48            | 439         | 33                       | 5           |
| Hypertension Optimal Treatment Trial                 | 712                    | 345                   | 182                             | 317         | 291                     | 170‡       | 51         | 63             | 284                | 305          | 0             | 589         | 176                      | 10          |
| Primary Prevention Project                           | 112                    | 46                    | 36                              | 39          | 6                       | 10         | 7          | 35             | 52                 | 76           | 12            | 140         | 9                        | 4           |
| Women's Health Study                                 | 999                    | 493                   | 365                             | 487         | 4                       | 134        | 58         | 55             | 247                | 850          | 154           | 1251        | 218                      | 1           |
| <b>Subtotal: 6 trials</b>                            | <b>3411</b>            | <b>1963</b>           | <b>1307</b>                     | <b>1295</b> | <b>420</b>              | <b>718</b> | <b>205</b> | <b>255</b>     | <b>1178</b>        | <b>1827</b>  | <b>279</b>    | <b>3284</b> | <b>544</b>               | <b>26</b>   |
| <b>Secondary prevention post-MI trials</b>           |                        |                       |                                 |             |                         |            |            |                |                    |              |               |             |                          |             |
| Cardiff-I                                            | 133                    | 129                   | 25                              | 1           | 0                       | 104        | 1          | 2              | 107                | 6            | 1             | 114         | 0                        | 0           |
| Cardiff-II                                           | 316                    | 306                   | 96                              | 10          | 7                       | 206        | 10         | 4              | 220                | 10           | 0             | 230         | 0                        | 0           |
| PARIS-I (2:1†)                                       | 212                    | 195                   | 84                              | 20          | 18                      | 110        | 5          | 3              | 118                | 19           | 0             | 137         | 0                        | 0           |
| AMIS                                                 | 795                    | 707                   | 317                             | 101         | 97                      | 388        | 10         | 10             | 408                | 52           | 5             | 465         | 0                        | 0           |
| CDP-A                                                | 178                    | 146                   | 59                              | 25          | 24                      | 85         | 5          | 14             | 104                | 6            | 0             | 110         | 0                        | 0           |
| Gamis                                                | 78                     | 61                    | 26                              | 2           | 0                       | 35         | 2          | 7              | 44                 | 7            | 8             | 59          | 0                        | 0           |
| <b>Subtotal: 6 trials</b>                            | <b>1712</b>            | <b>1544</b>           | <b>607</b>                      | <b>159</b>  | <b>146</b>              | <b>928</b> | <b>33</b>  | <b>40</b>      | <b>1001</b>        | <b>100</b>   | <b>14</b>     | <b>1115</b> | <b>0</b>                 | <b>0</b>    |
| <b>Secondary prevention post TIA / stroke trials</b> |                        |                       |                                 |             |                         |            |            |                |                    |              |               |             |                          |             |
| AITIA                                                | 61                     | 17                    | 6                               | 40          | 39                      | 7          | 6          | 10             | 23                 | 3            | 0             | 26          | 3                        | 0           |
| UK-TIA (2:1†)                                        | 558                    | 245                   | 77                              | 320         | 224                     | 163        | 55         | 35             | 253                | 77           | 13            | 343         | 15                       | 2           |
| Reuther                                              | 7                      | 1                     | 0                               | 6           | 4                       | 1          | 2          | 0              | 3                  | 0            | 0             | 3           | 1                        | 0           |
| CA Co-op                                             | 63                     | 16                    | 4                               | 43          | 43                      | 12         | 9          | 5              | 26                 | 5            | 0             | 31          | 0                        | 0           |
| Toulouse TIA                                         | 27                     | 7                     | 2                               | 16          | 16                      | 5          | 5          | 4              | 14                 | 11           | 0             | 25          | 0                        | 0           |
| AICLA                                                | 79                     | 15                    | 11                              | 53          | 49                      | 4          | 6          | 5              | 15                 | 12           | 10            | 37          | 0                        | 0           |
| Danish Co-op                                         | 50                     | 20                    | 10                              | 32          | 29                      | 10         | 4          | 1              | 15                 | 5            | 1             | 21          | 0                        | 0           |
| Britton                                              | 114                    | 42                    | 21                              | 63          | 15                      | 15         | 20         | 22             | 57                 | 14           | 0             | 71          | 5                        | 0           |
| Danish Low Dose                                      | 42                     | 16                    | 2                               | 21          | 20                      | 14         | 1          | 3              | 18                 | 4            | 2             | 24          | 0                        | 0           |
| SALT                                                 | 307                    | 119                   | 53                              | 180         | 11                      | 54         | 32         | 34             | 120                | 35           | 5             | 160         | 4                        | 0           |
| <b>Subtotal: 10 trials</b>                           | <b>1308</b>            | <b>498</b>            | <b>186</b>                      | <b>774</b>  | <b>450</b>              | <b>285</b> | <b>140</b> | <b>119</b>     | <b>544</b>         | <b>166</b>   | <b>31</b>     | <b>741</b>  | <b>28</b>                | <b>2</b>    |

† Allocation ratio 2:1; in tables or figures where adjusted numbers of controls are given, the number of events in the control group of this study is doubled. ‡Includes 149 sudden deaths.

**Web Table 3: Rate ratios associated with risk factors for selected outcomes among people with no known vascular disease in primary prevention trials**

| <b>Variable</b>                | <b>Serious vascular event</b> | <b>Non fatal MI</b> | <b>CHD death</b> | <b>Major coronary event</b> | <b>Probably ischaemic stroke</b> | <b>Haemorrhagic stroke</b> | <b>Any stroke</b> | <b>Non fatal MI or probably ischaemic stroke</b> | <b>Major GI or other extracranial bleed</b> | <b>Non fatal major GI or other extracranial bleed</b> |
|--------------------------------|-------------------------------|---------------------|------------------|-----------------------------|----------------------------------|----------------------------|-------------------|--------------------------------------------------|---------------------------------------------|-------------------------------------------------------|
| Age, per decade                | 2.08 (1.99,2.17)              | 1.63 (1.52,1.75)    | 2.37 (2.15,2.62) | 1.84 (1.74,1.95)            | 2.46 (2.27,2.65)                 | 1.59 (1.33,1.90)           | 2.29 (2.13,2.46)  | 1.91 (1.81,2.02)                                 | 2.15 (1.93,2.39)                            | 2.10 (1.88,2.34)                                      |
| Male gender *                  | 1.86 (1.60,2.16)              | 2.58 (1.91,3.49)    | 2.21 (1.58,3.07) | 2.43 (1.94,3.04)            | 1.44 (1.14,1.82)                 | 1.11 (0.52,2.34)           | 1.39 (1.12,1.74)  | 1.85 (1.52,2.24)                                 | 1.99 (1.45,2.73)                            | 1.98 (1.42,2.75)                                      |
| Diabetes                       | 2.43 (2.16,2.74)              | 2.80 (2.31,3.40)    | 2.42 (1.86,3.15) | 2.66 (2.28,3.12)            | 2.06 (1.67,2.54)                 | 1.74 (0.95,3.17)           | 2.02 (1.66,2.46)  | 2.39 (2.06,2.78)                                 | 1.55 (1.13,2.14)                            | 1.55 (1.11,2.16)                                      |
| Current smoker                 | 2.03 (1.87,2.20)              | 1.96 (1.72,2.23)    | 2.17 (1.83,2.58) | 2.05 (1.85,2.28)            | 2.00 (1.72,2.31)                 | 2.18 (1.57,3.02)           | 2.02 (1.77,2.31)  | 1.97 (1.78,2.17)                                 | 1.56 (1.25,1.94)                            | 1.50 (1.20,1.88)                                      |
| Mean blood pressure            | 1.79 (1.67,1.92)              | 1.59 (1.42,1.77)    | 2.10 (1.83,2.42) | 1.73 (1.59,1.89)            | 2.00 (1.77,2.26)                 | 2.18 (1.65,2.87)           | 2.02 (1.81,2.26)  | 1.76 (1.62,1.92)                                 | 1.32 (1.09,1.58)                            | 1.32 (1.09,1.60)                                      |
| Cholesterol                    | 1.10 (1.06,1.14)              | 1.23 (1.16,1.31)    | 1.09 (1.00,1.18) | 1.18 (1.12,1.24)            | 1.02 (0.95,1.09)                 | 0.90 (0.77,1.07)           | 1.00 (0.94,1.06)  | 1.13 (1.08,1.19)                                 | 0.99 (0.90,1.08)                            | 0.98 (0.89,1.08)                                      |
| BMI (per 5 kg/m <sup>2</sup> ) | 1.07 (1.02,1.11)              | 1.10 (1.03,1.18)    | 1.07 (0.97,1.18) | 1.09 (1.03,1.15)            | 1.06 (0.98,1.14)                 | 0.85 (0.71,1.02)           | 1.02 (0.96,1.09)  | 1.08 (1.03,1.14)                                 | 1.24 (1.13,1.35)                            | 1.22 (1.11,1.34)                                      |

\* The relevance of male gender can be assessed only in the two trials that included both men and women, so the confidence intervals for its relevance are wide, particularly for stroke.

GI = Gastrointestinal.

Total cholesterol was not available in the British Doctors Study.

Excluding the 2% of participants with known history of vascular disease.

Rate ratios for cholesterol are per 1mmol/L and for mean blood pressure per 20mmHg.

**Web Figure 1: MAJOR CORONARY EVENTS in primary prevention trials - subgroup analyses**

Symbols and conventions as in text - figure 2

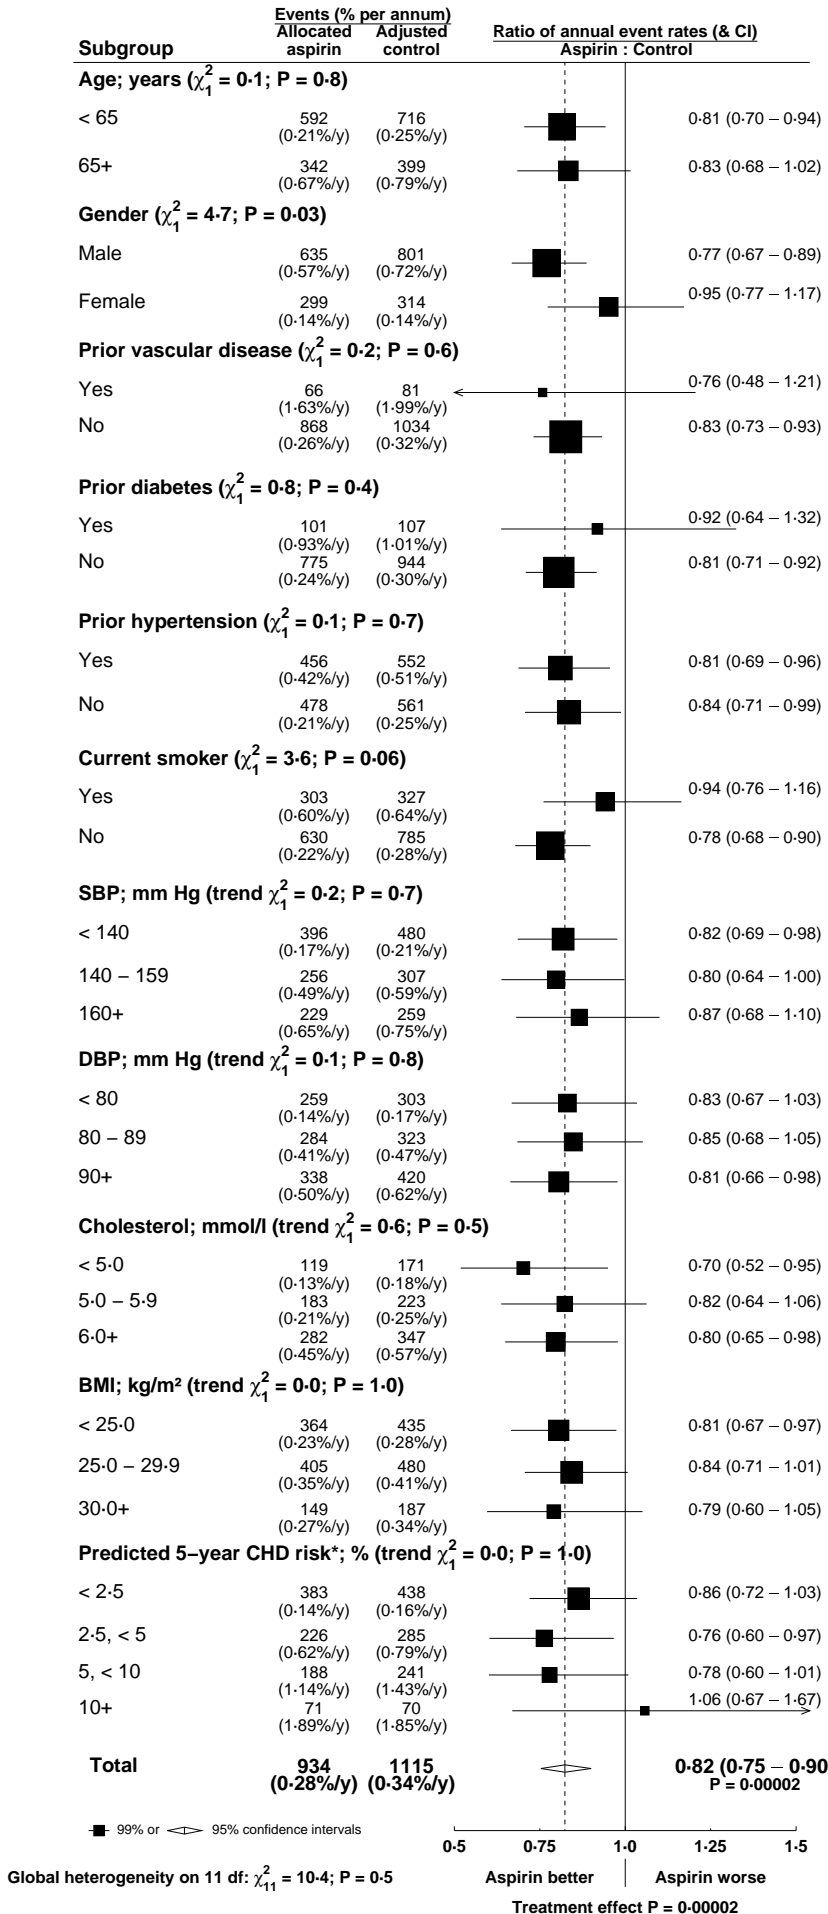

N.B. Unknown values not plotted

\* Excluding patients with history of vascular disease

Note that the regression model may have slightly overestimated risk in the high risk group.

**Web Figure 2: MAJOR CORONARY EVENTS in primary prevention trials, by study**

Symbols and conventions as in text - figure 2

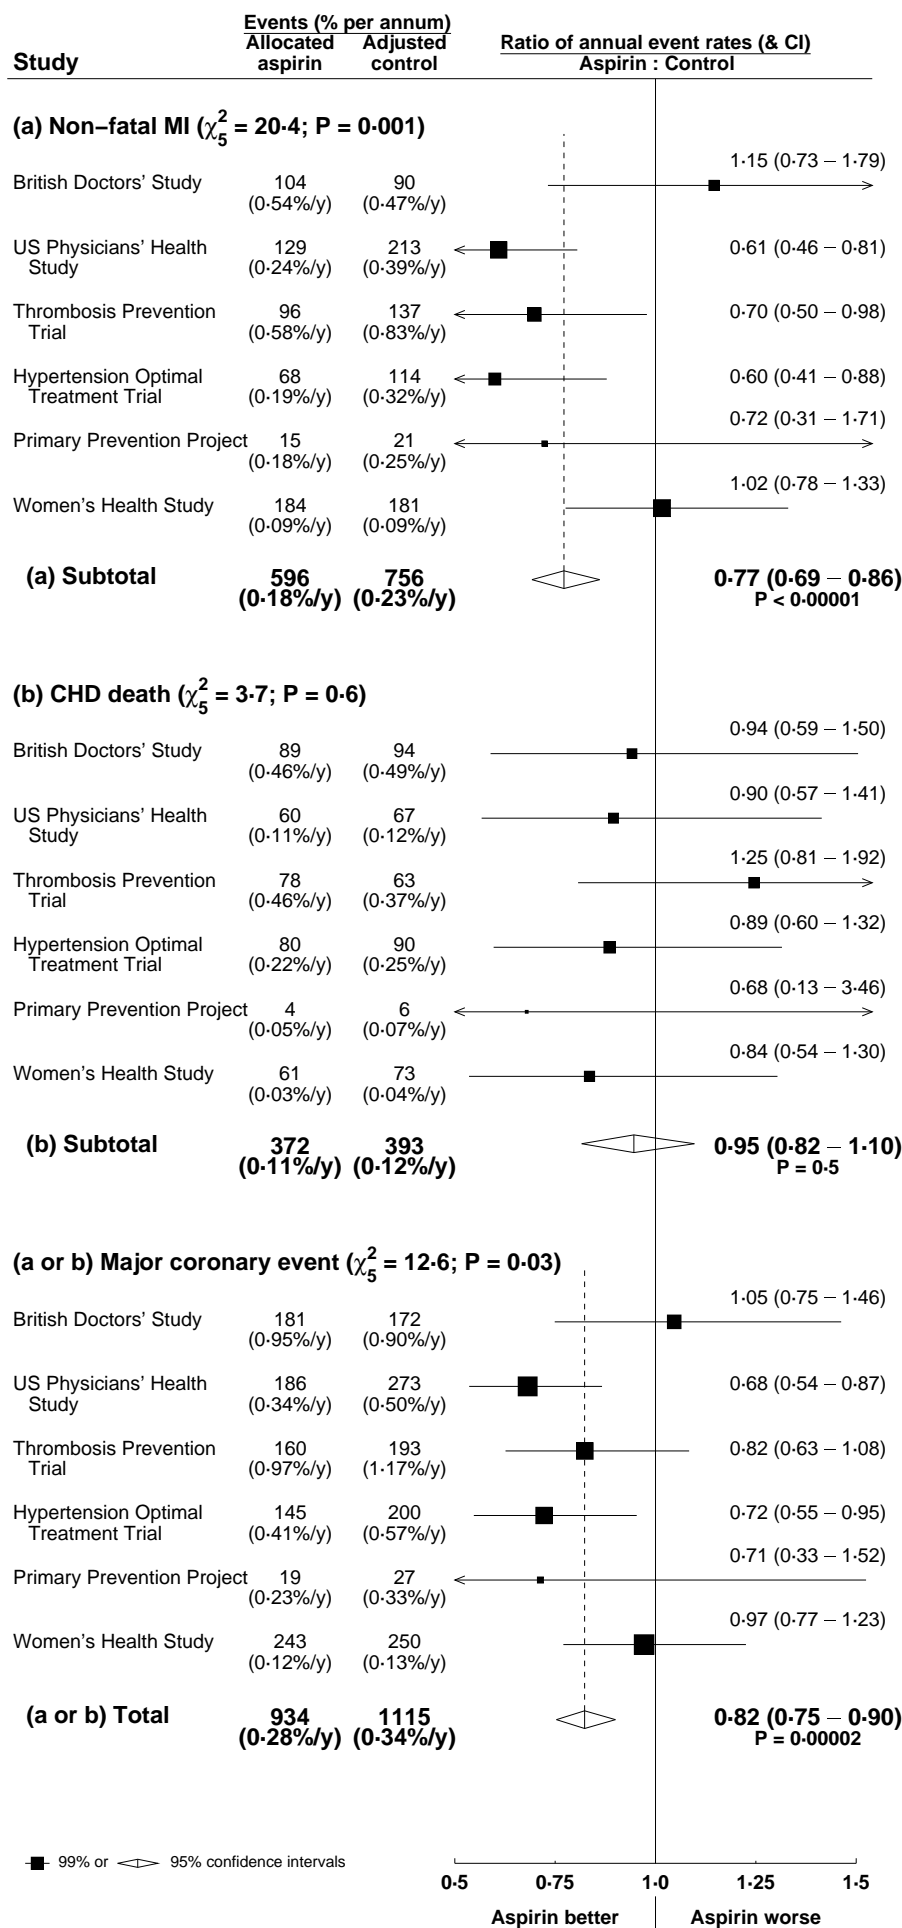

**Web Figure 3: STROKE SUBTYPES (first stroke only) in primary prevention trials, by study**

Symbols and conventions as in text - figure 2

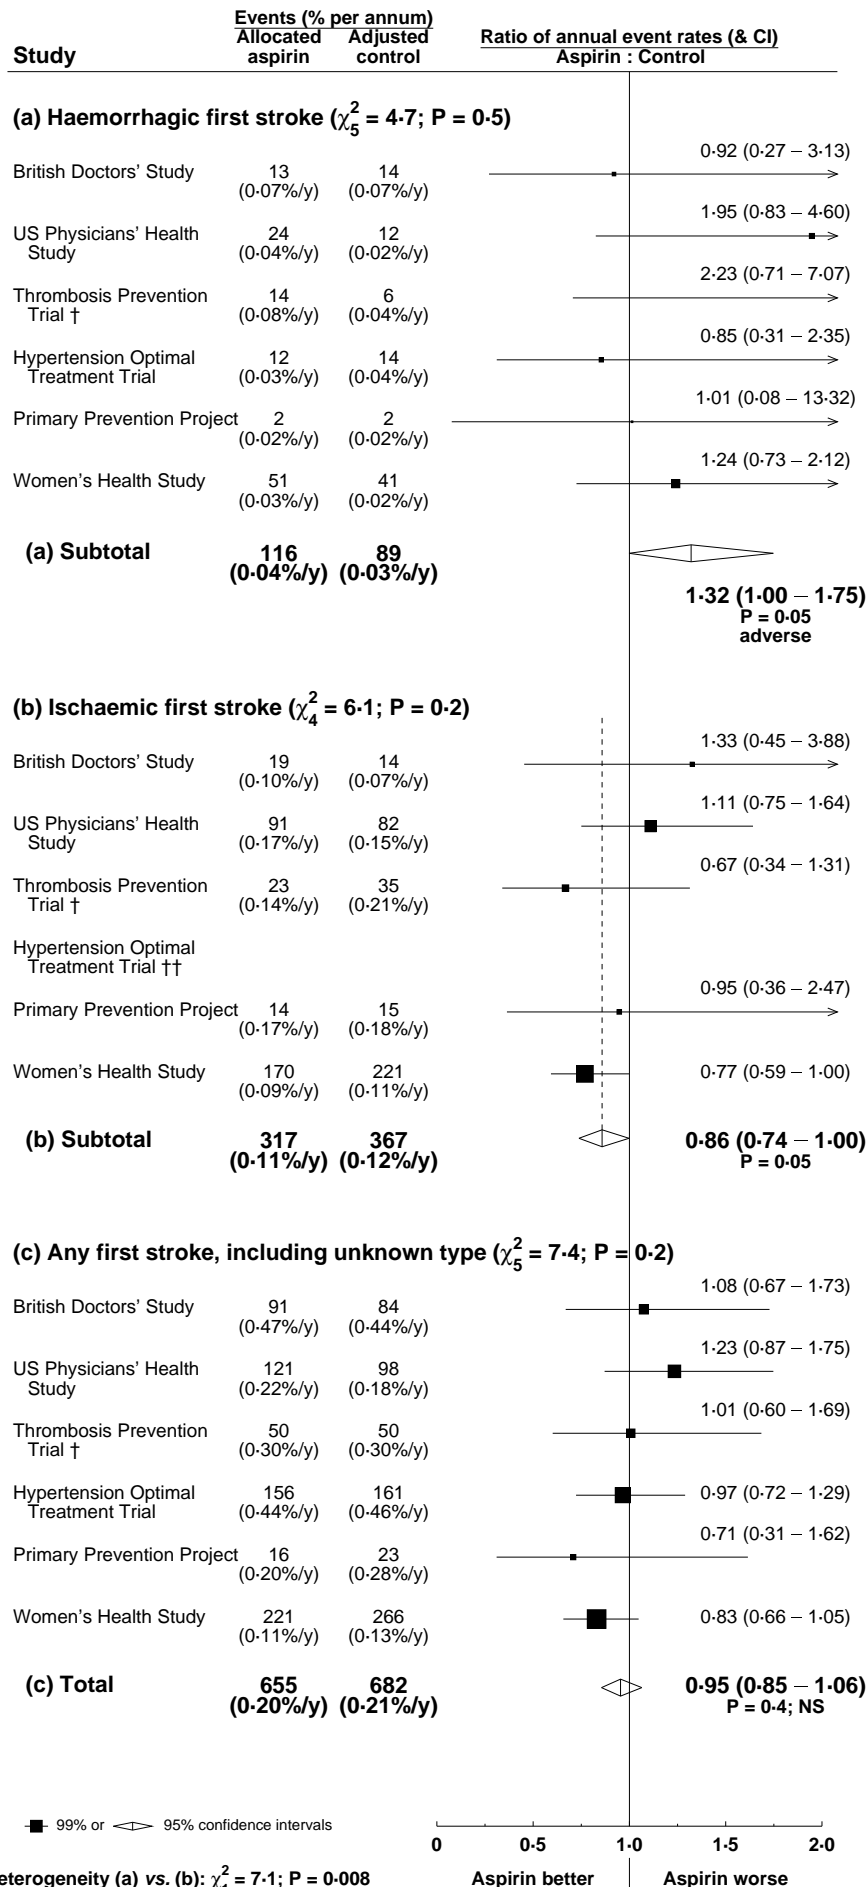

† Aspirin vs. control in the half not allocated warfarin in TPT: 4 vs. 2 haemorrhagic, 12 vs. 19 ischaemic and 5 vs. 6 unknown strokes.

†† Non-haemorrhagic strokes in HOT were not further subdivided.



**Web Figure 4: PROBABLY ISCHAEMIC STROKE in primary prevention trials - subgroup analyses**

Symbols and conventions as in text - figure 2

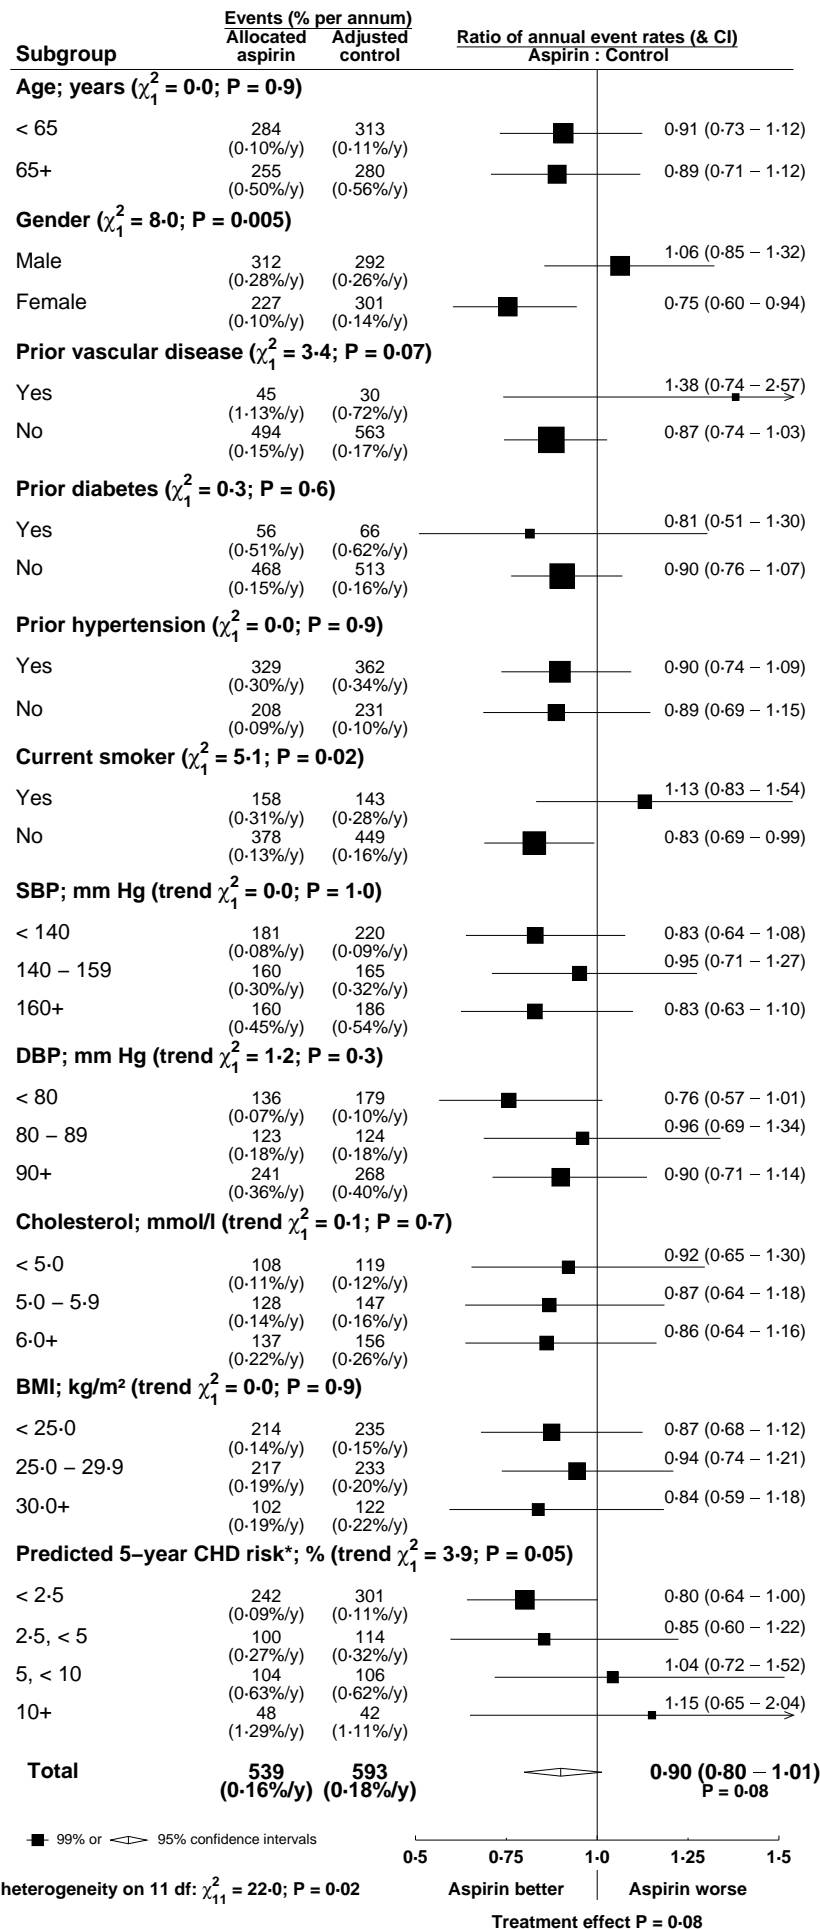

N.B. Unknown values not plotted

\* Excluding patients with history of vascular disease

**Web Figure 5: FIRST STROKE (any type) in primary prevention trials - subgroup analyses**

Symbols and conventions as in text - figure 2

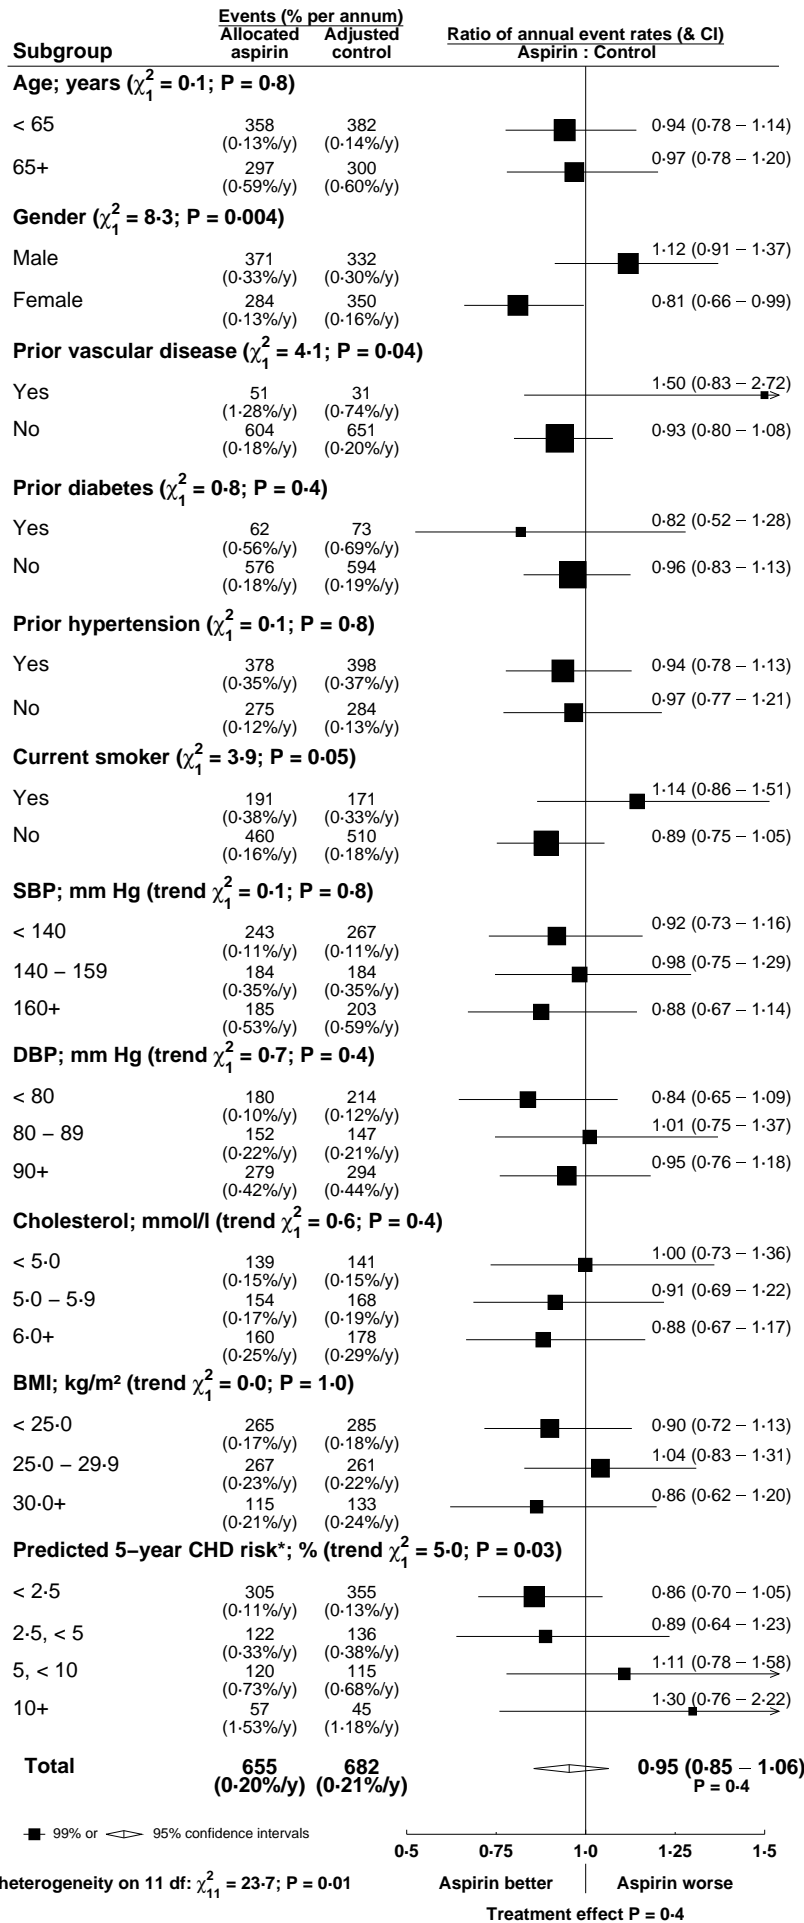

N.B. Unknown values not plotted

\* Excluding patients with history of vascular disease

**Web Figure 6: GASTRO-INTESTINAL BLEED (or other major extracranial bleed) in primary prevention trials, by study**

Symbols and conventions as in text - figure 2

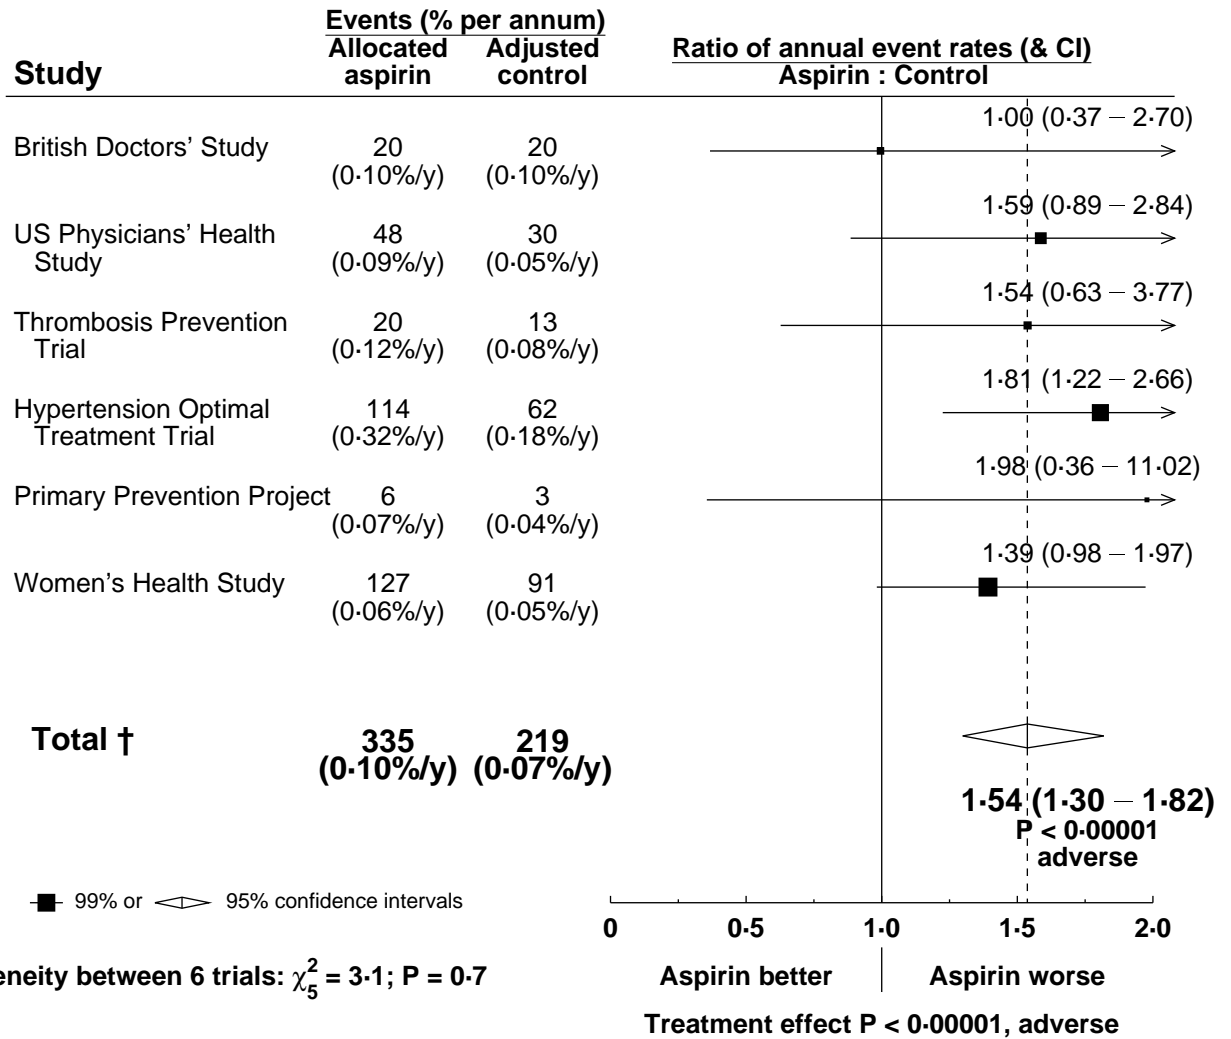

**Web Figure 7: GASTRO-INTESTINAL BLEED (or other major extracranial bleed) in primary prevention trials - subgroup analyses.** Symbols and conventions as in text - figure 2

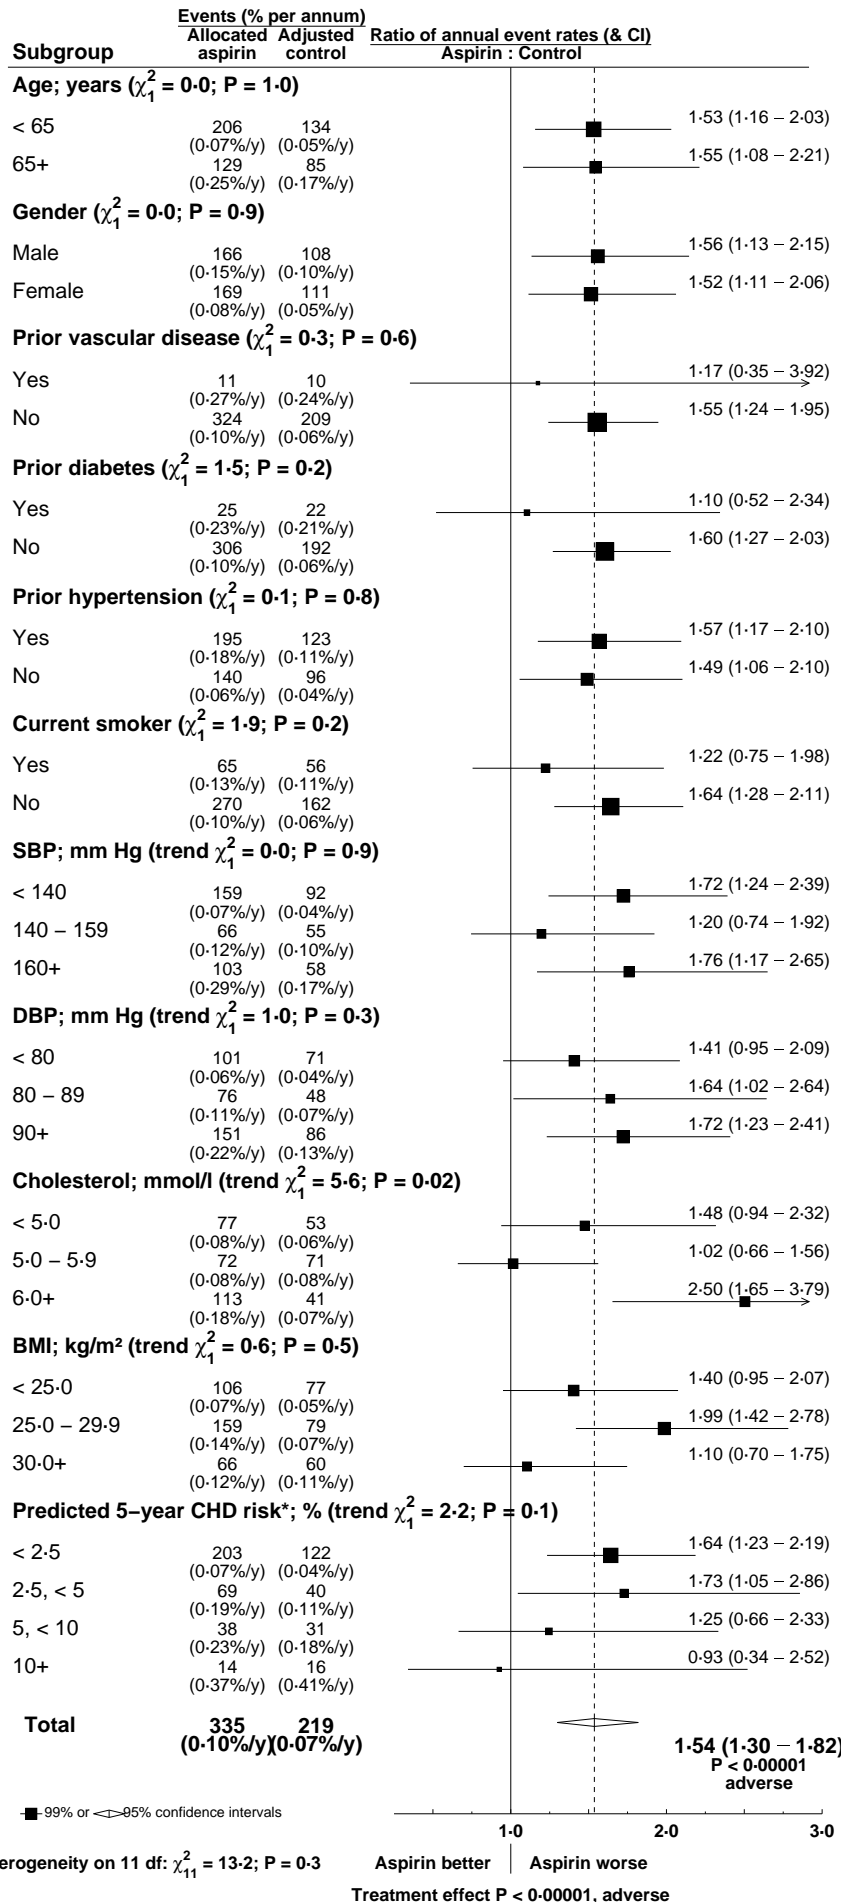

N.B. Unknown values not plotted

\* Excluding patients with history of vascular disease

**Web Figure 8: SERIOUS VASCULAR EVENTS in secondary prevention trials, by study**  
 Symbols and conventions as in text - figure 2

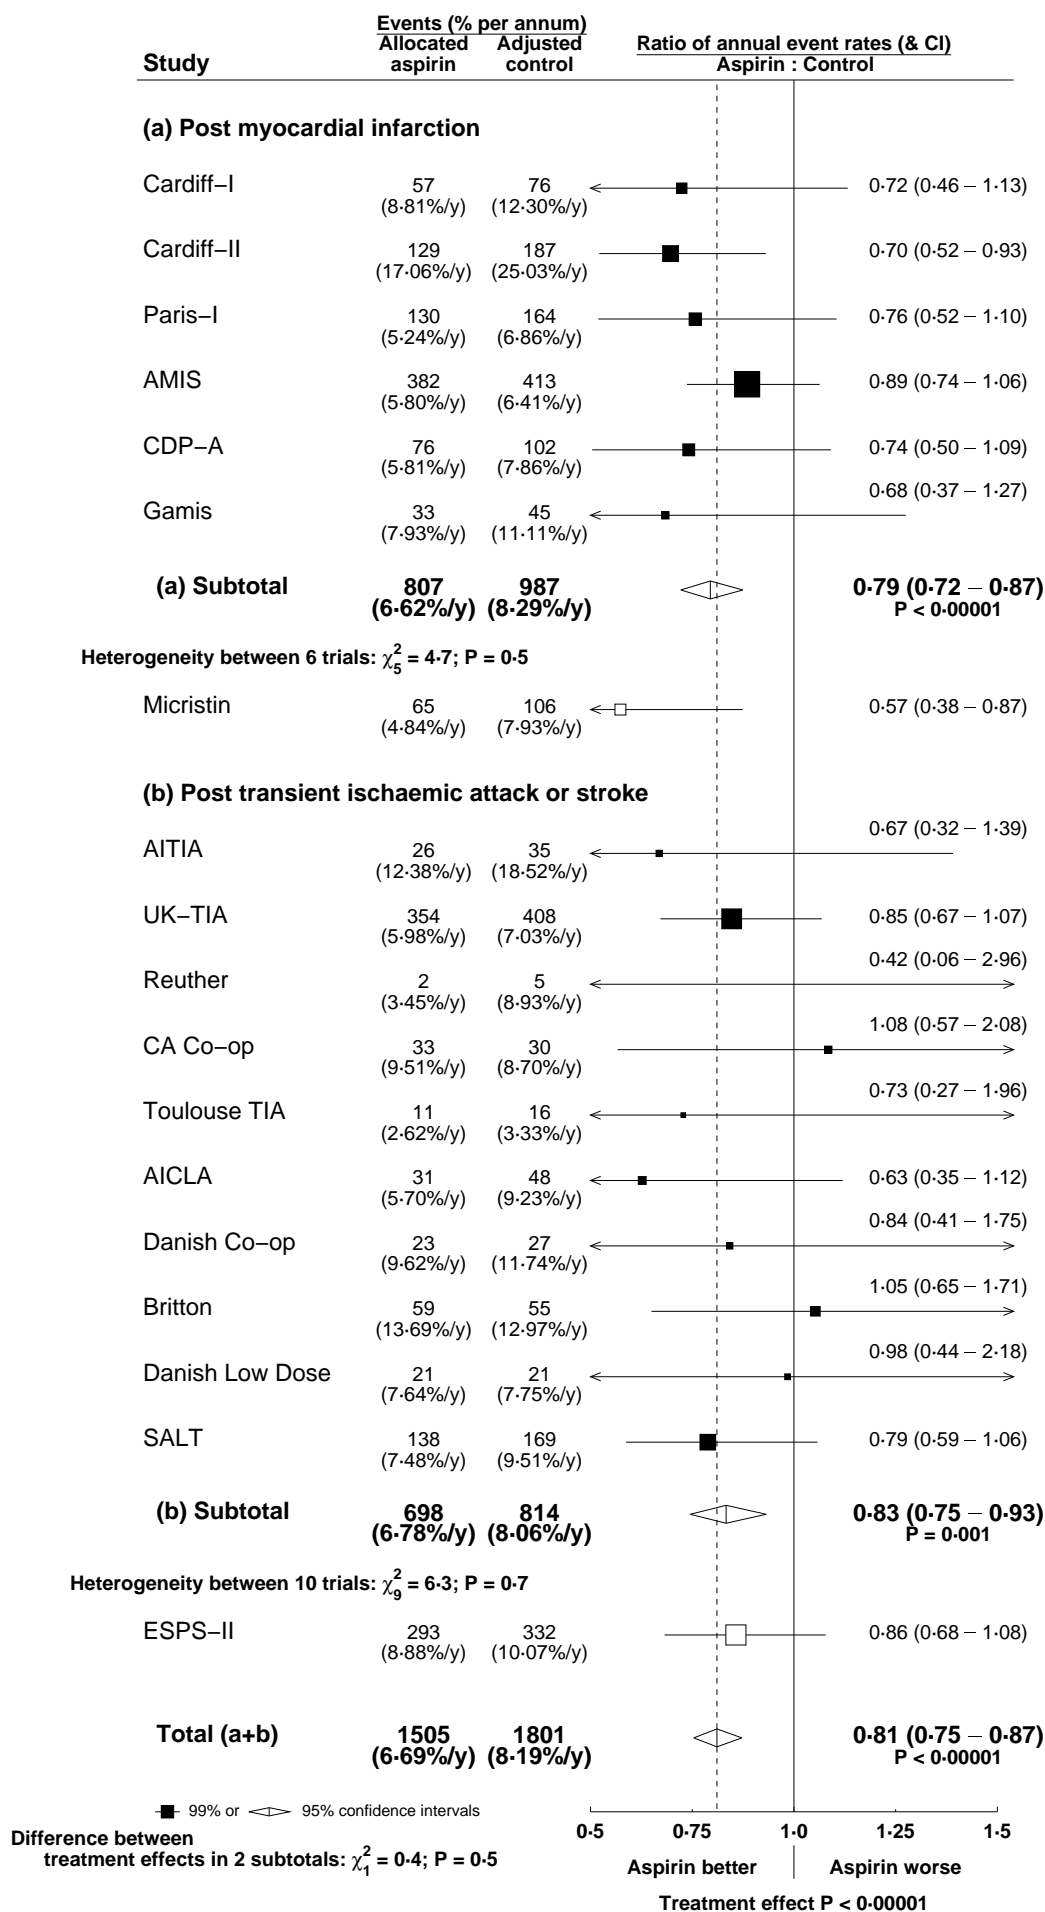

Open squares indicate trials for which only tabular data were available; these trials do not contribute to the subtotals or total.

**Web Figure 9: NON-FATAL MYOCARDIAL INFARCTION** in secondary prevention trials, by study  
 Symbols and conventions as in text - figure 2

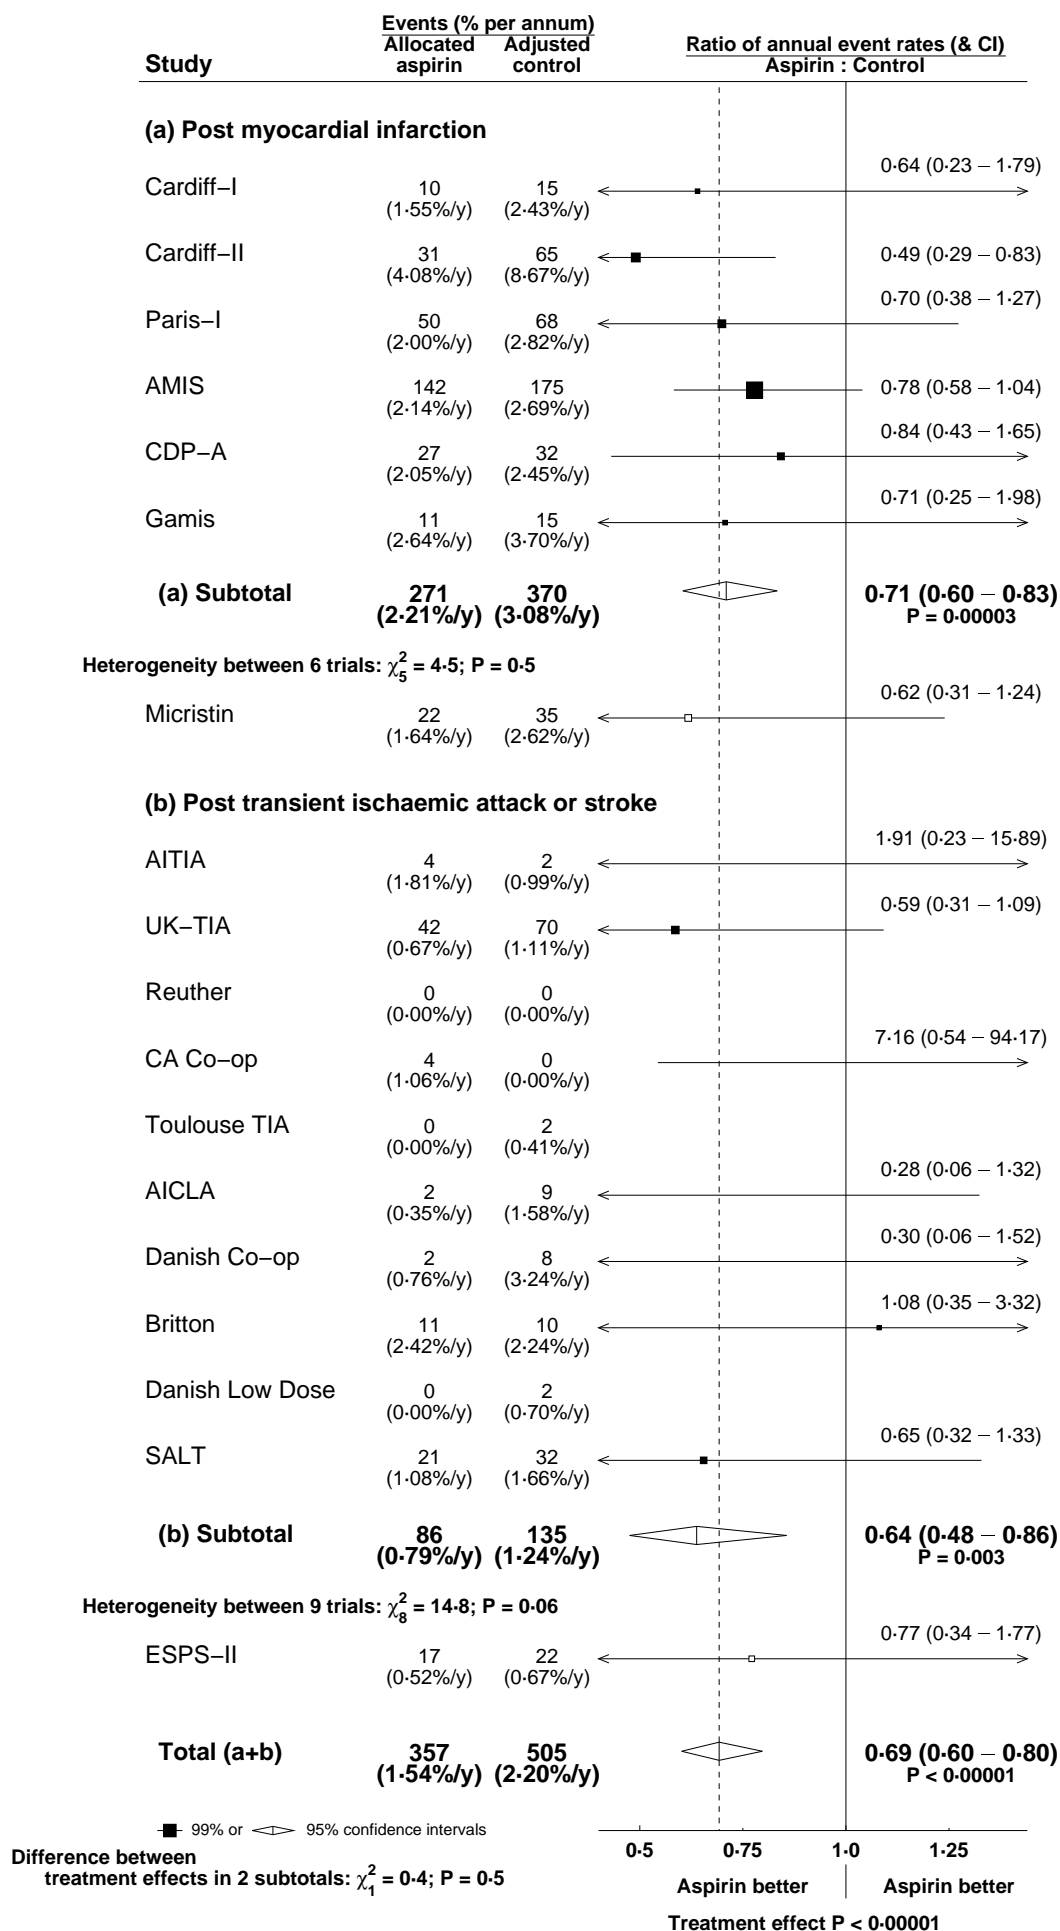

Open squares indicate trials for which only tabular data were available; these trials do not contribute to the subtotals or total.

Web Figure 10: CHD DEATH in secondary prevention trials, by study

Symbols and conventions as in text - figure 2

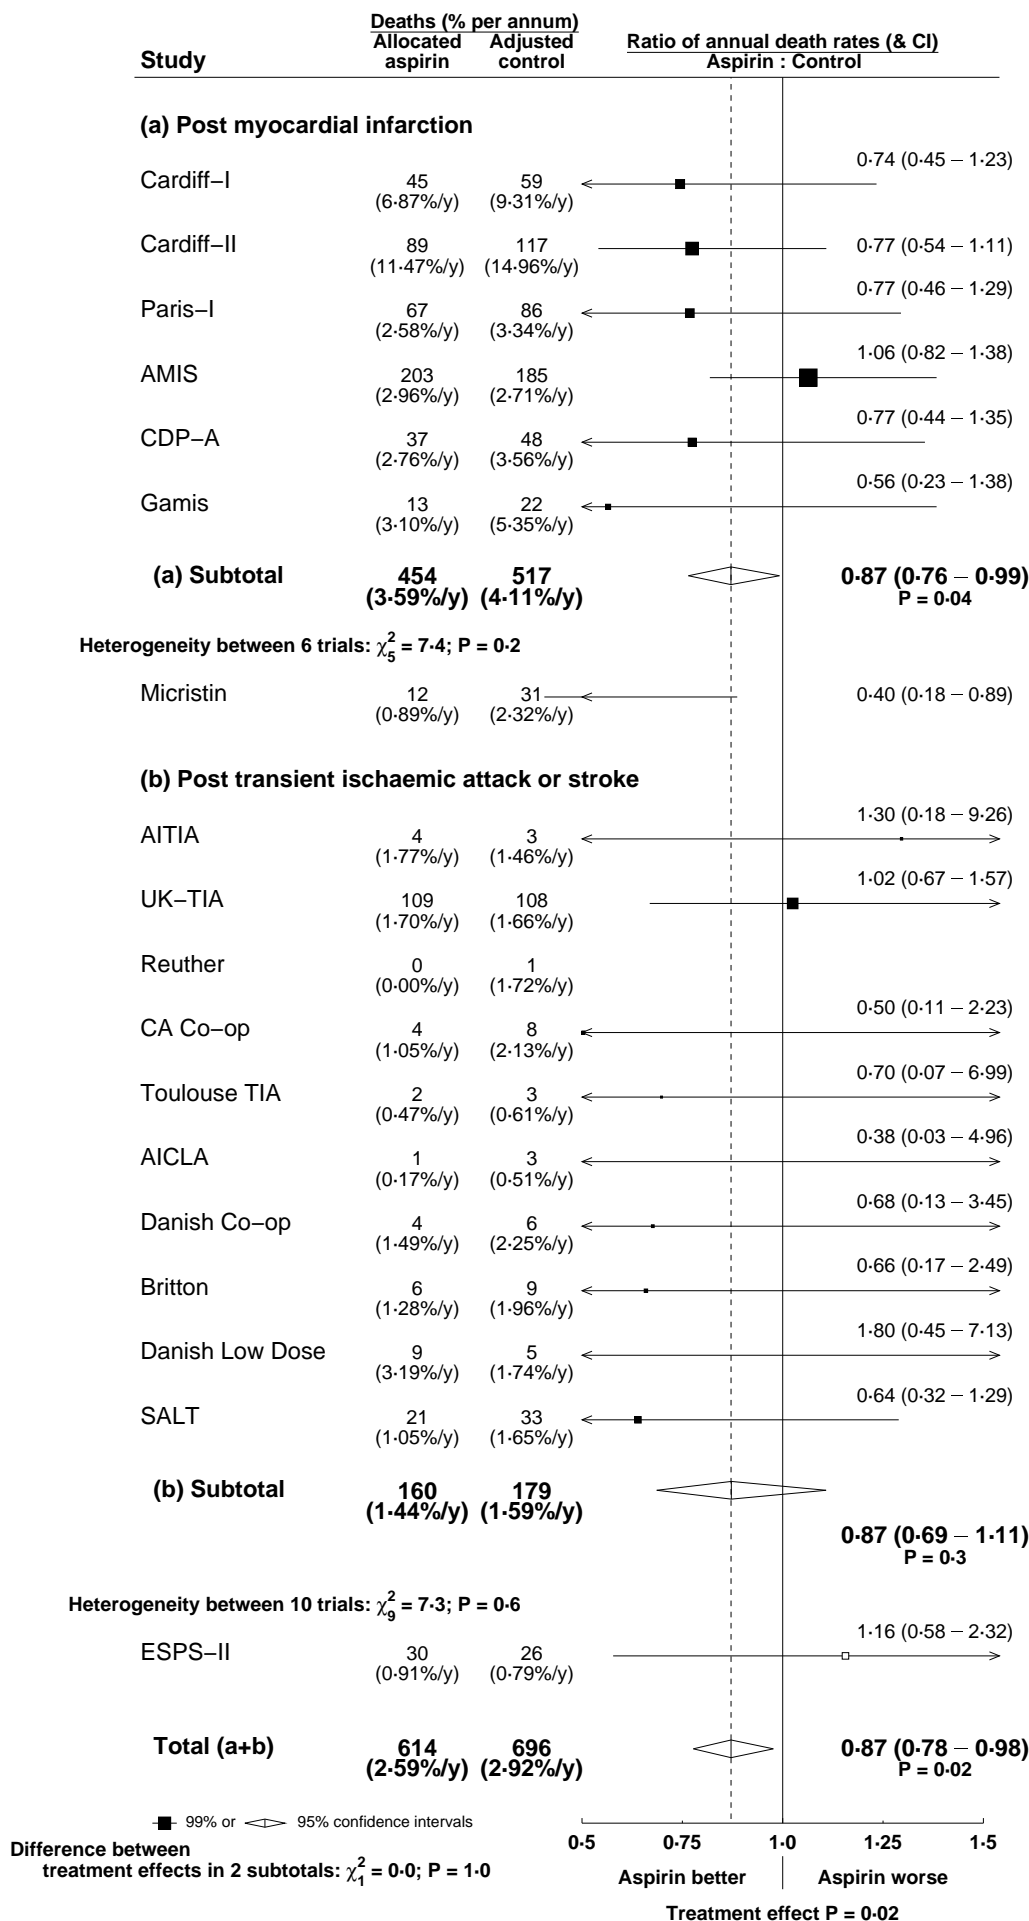

Open squares indicate trials for which only tabular data were available; these trials do not contribute to the subtotals or total.

**Web Figure 11: MAJOR CORONARY EVENTS in secondary prevention trials, by study**  
 Symbols and conventions as in text - figure 2

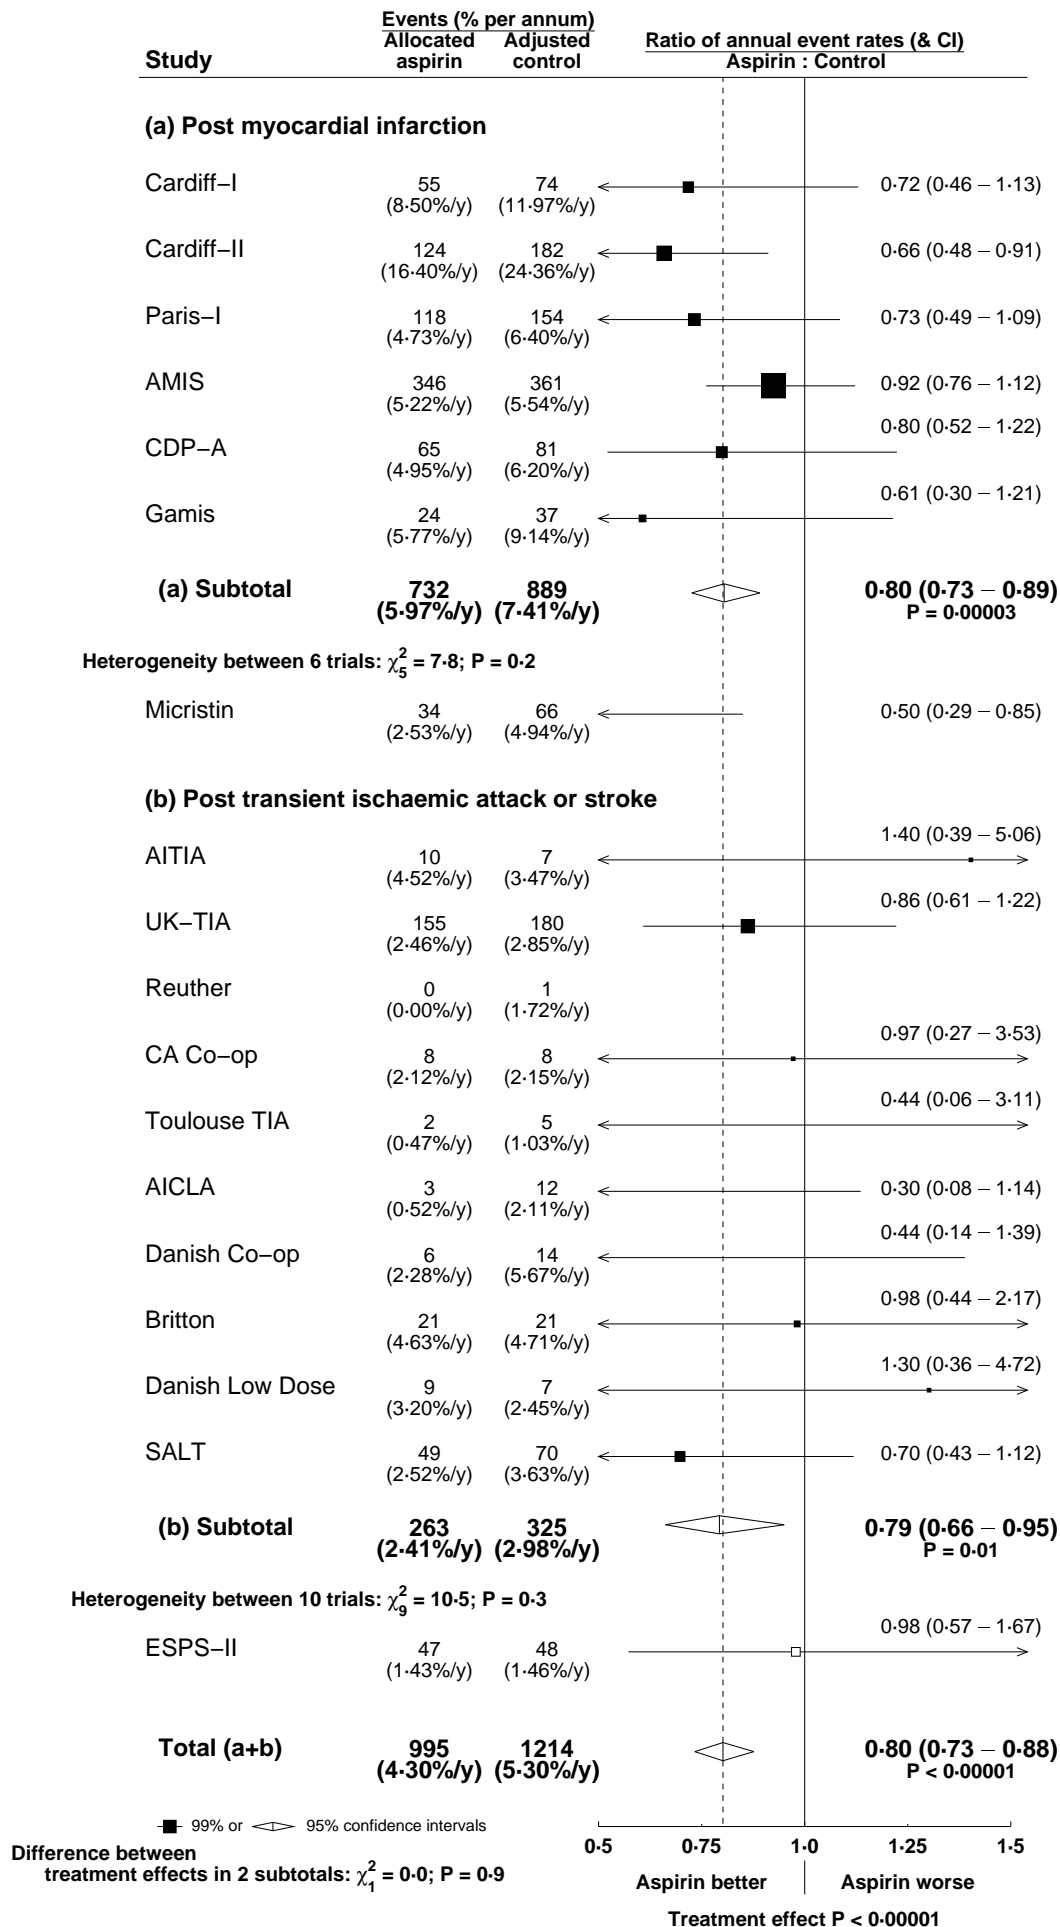

Open squares indicate trials for which only tabular data were available; these trials do not contribute to the subtotals or total.



Web Figure 12: HAEMORRHAGIC STROKE in secondary prevention trials, by study

Symbols and conventions as in text - figure 2

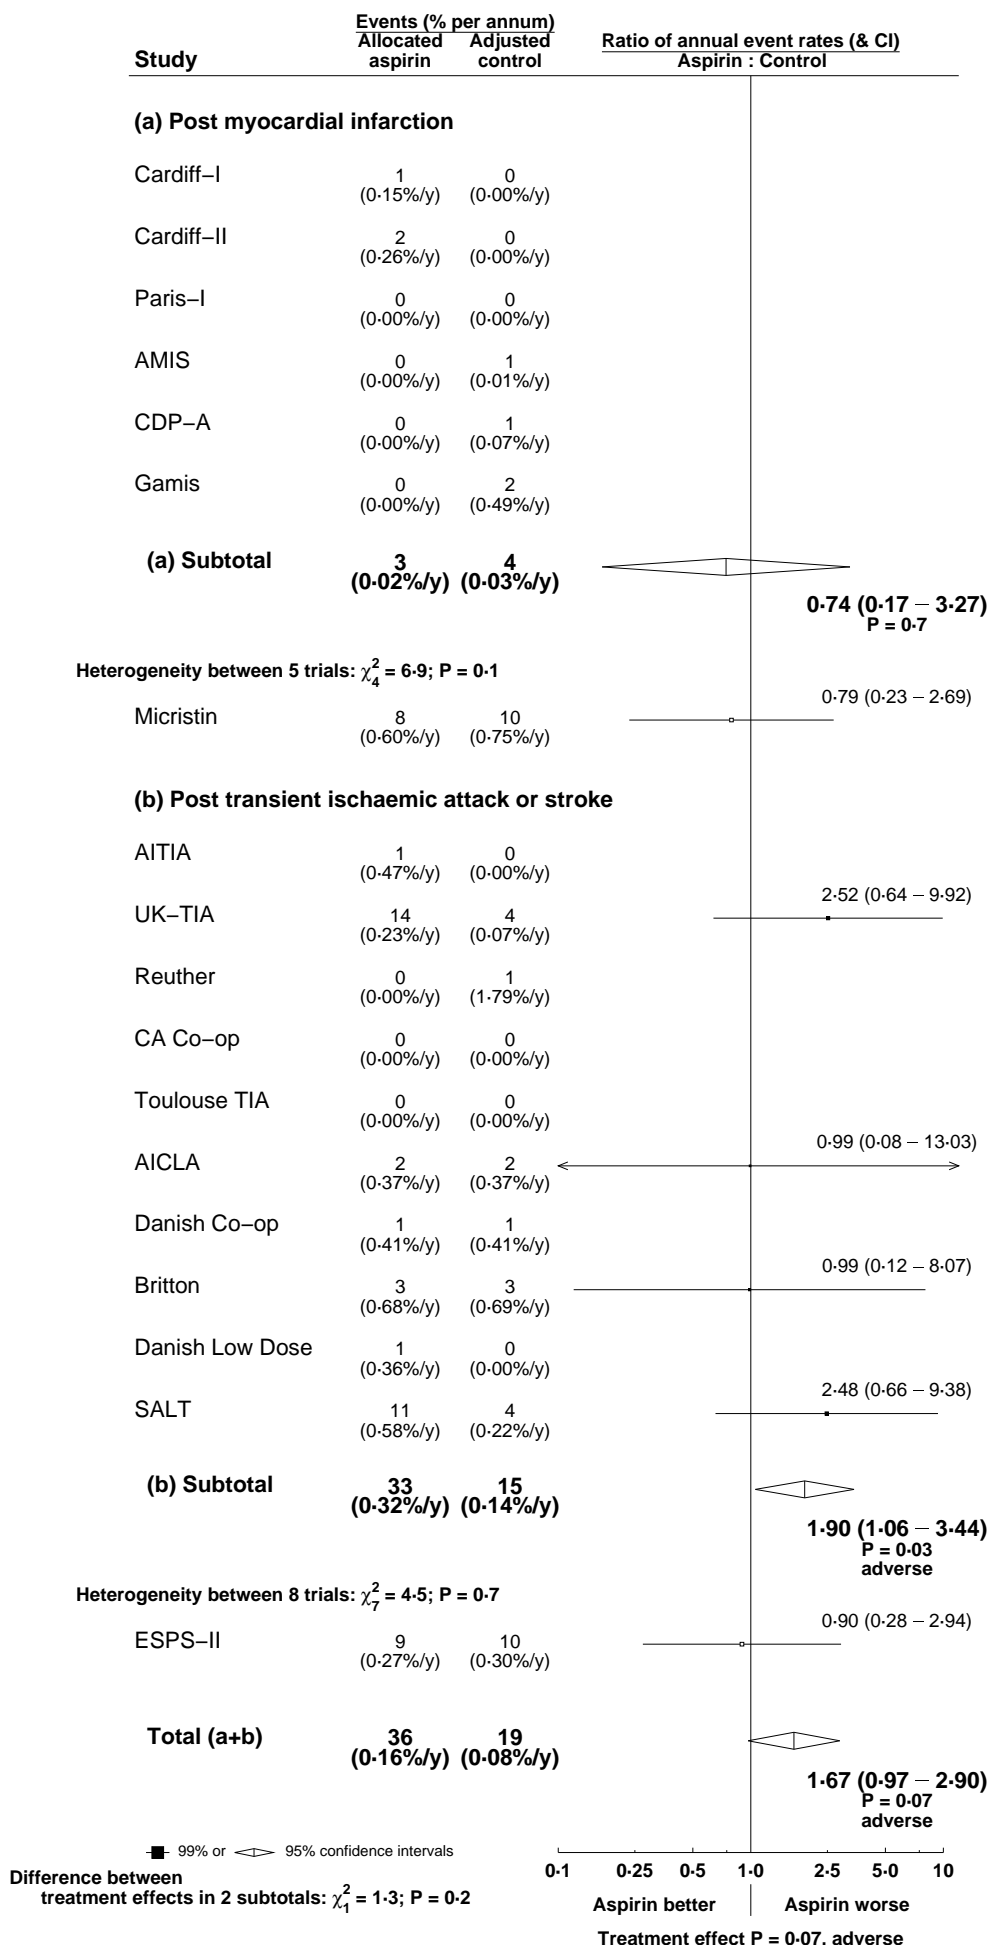

Open squares indicate trials for which only tabular data were available; these trials do not contribute to the subtotals or total.

NB: Most strokes of known cause were in just three trials (UK-TIA, Britton and SALT), all in patients with prior cerebral vascular disease.

**Web Figure 13: DEFINITELY ISCHAEMIC STROKE in secondary prevention trials, by study**

Symbols and conventions as in text - figure 2

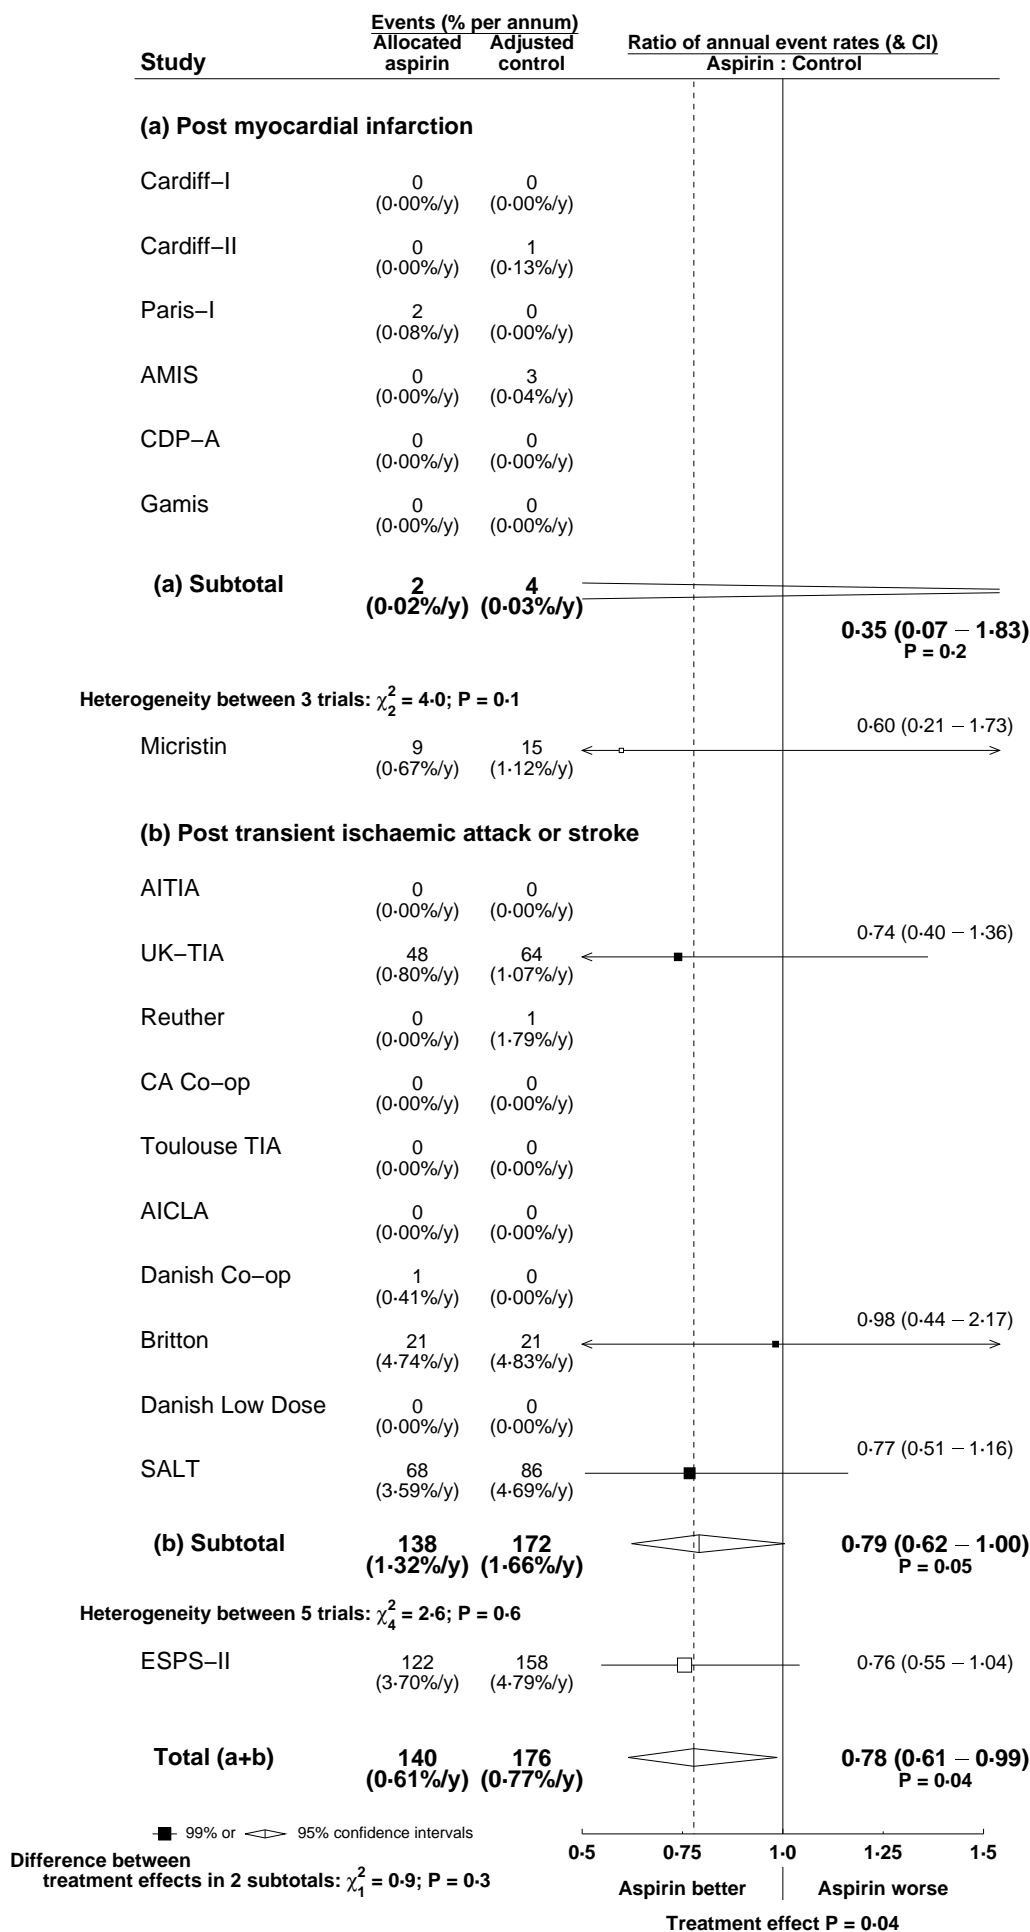

Open squares indicate trials for which only tabular data were available; these trials do not contribute to the subtotals or total.  
 NB: Most strokes of known cause were in just three trials (UK-TIA, Britton and SALT), all in patients with prior cerebral vascular disease.

Web Figure 14: PROBABLY ISCHAEMIC STROKE in secondary prevention trials, by study

Symbols and conventions as in text - figure 2

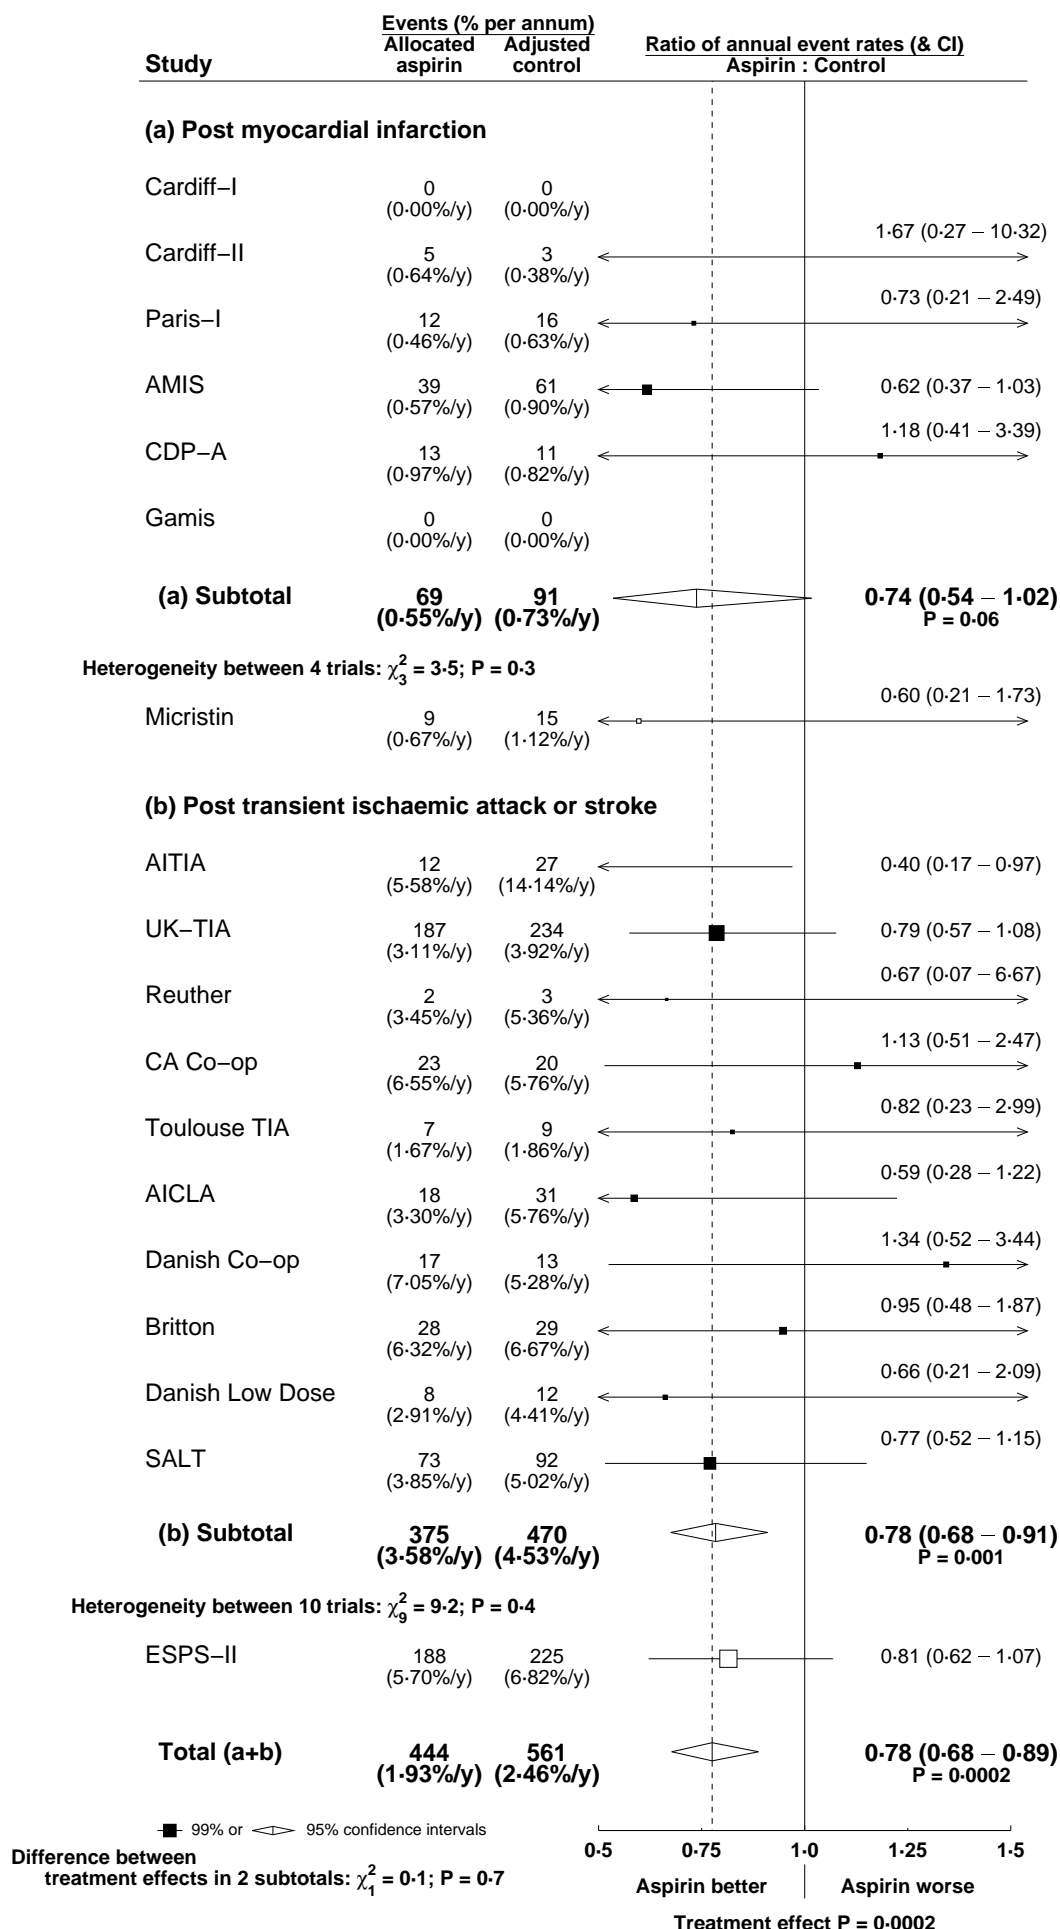

Open squares indicate trials for which only tabular data were available; these trials do not contribute to the subtotals or total.  
 NB: Most strokes of known cause were in just three trials (UK-TIA, Britton and SALT), all in patients with prior cerebral vascular disease.

**Web Figure 15: ANY STROKE in secondary prevention trials, by study**

Symbols and conventions as in text - figure 2

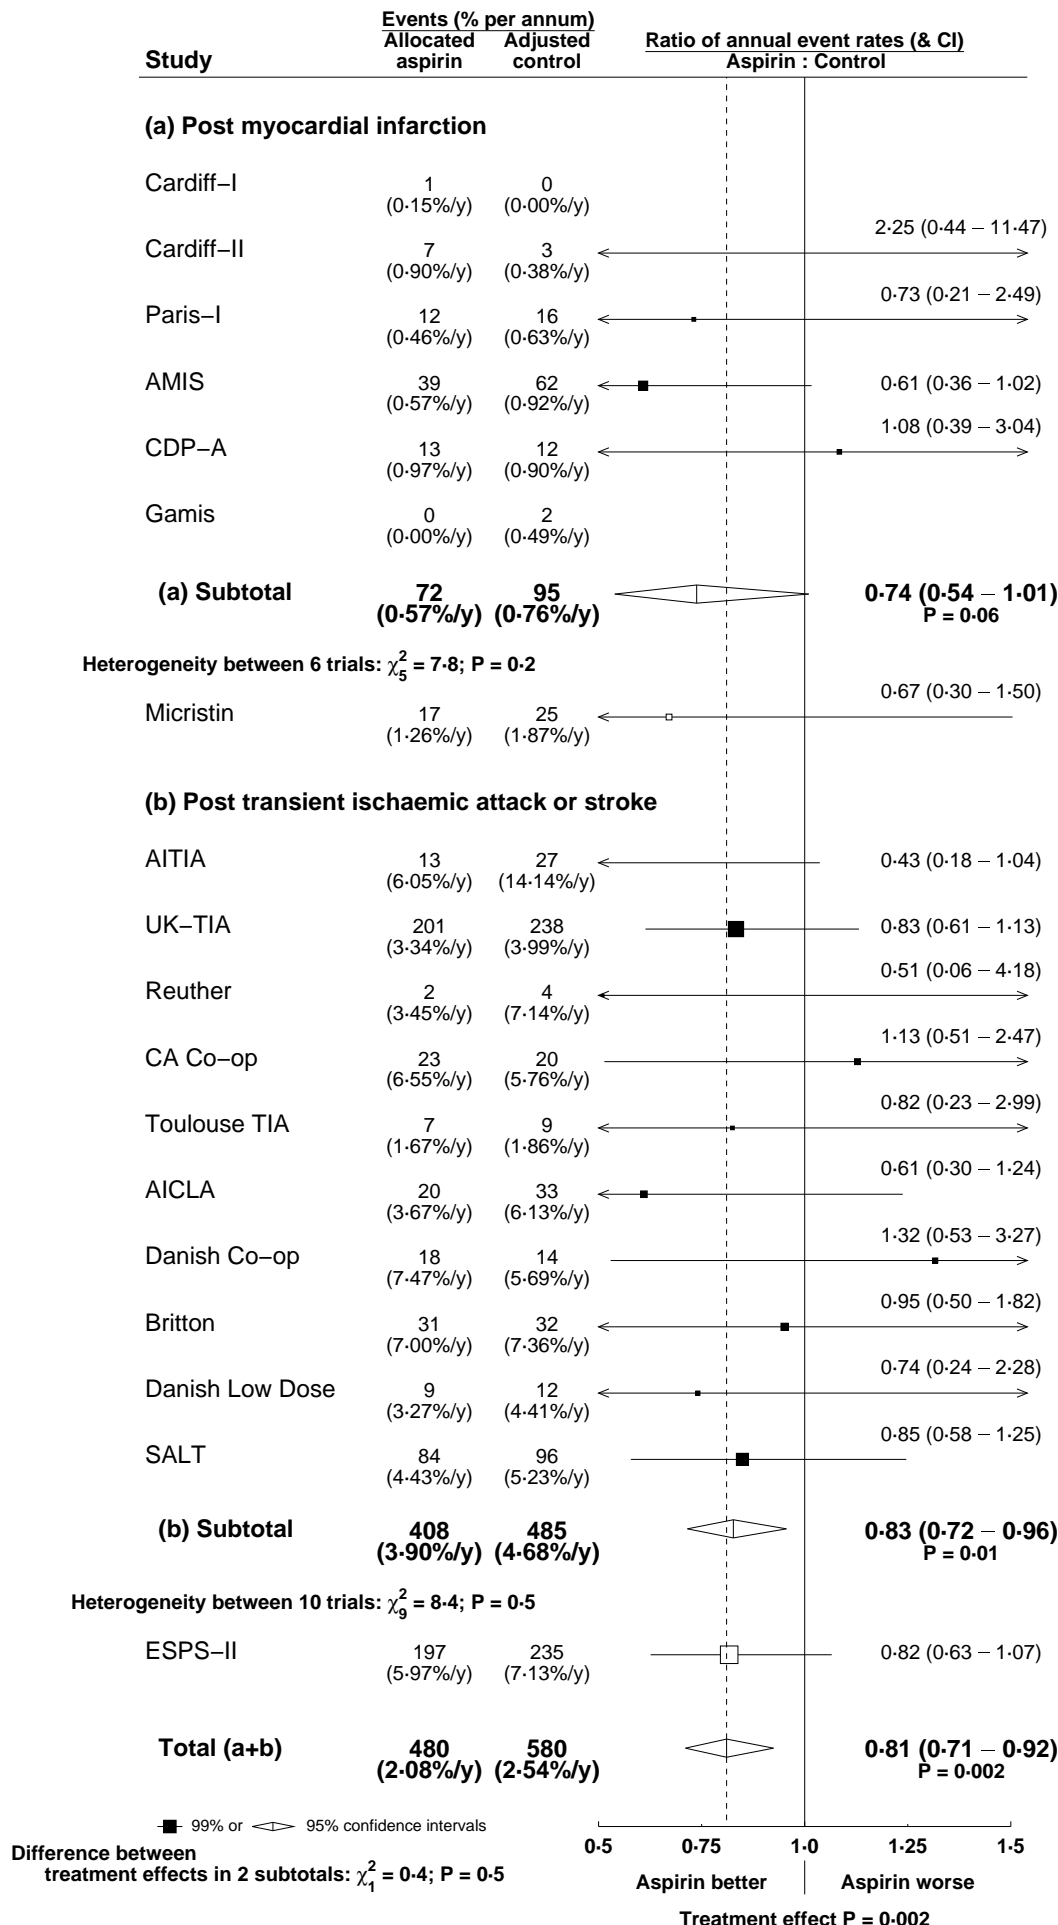

Open squares indicate trials for which only tabular data were available; these trials do not contribute to the subtotals or total.

Web Figure 16: VASCULAR DEATH in secondary prevention trials, by study

Symbols and conventions as in text - figure 2

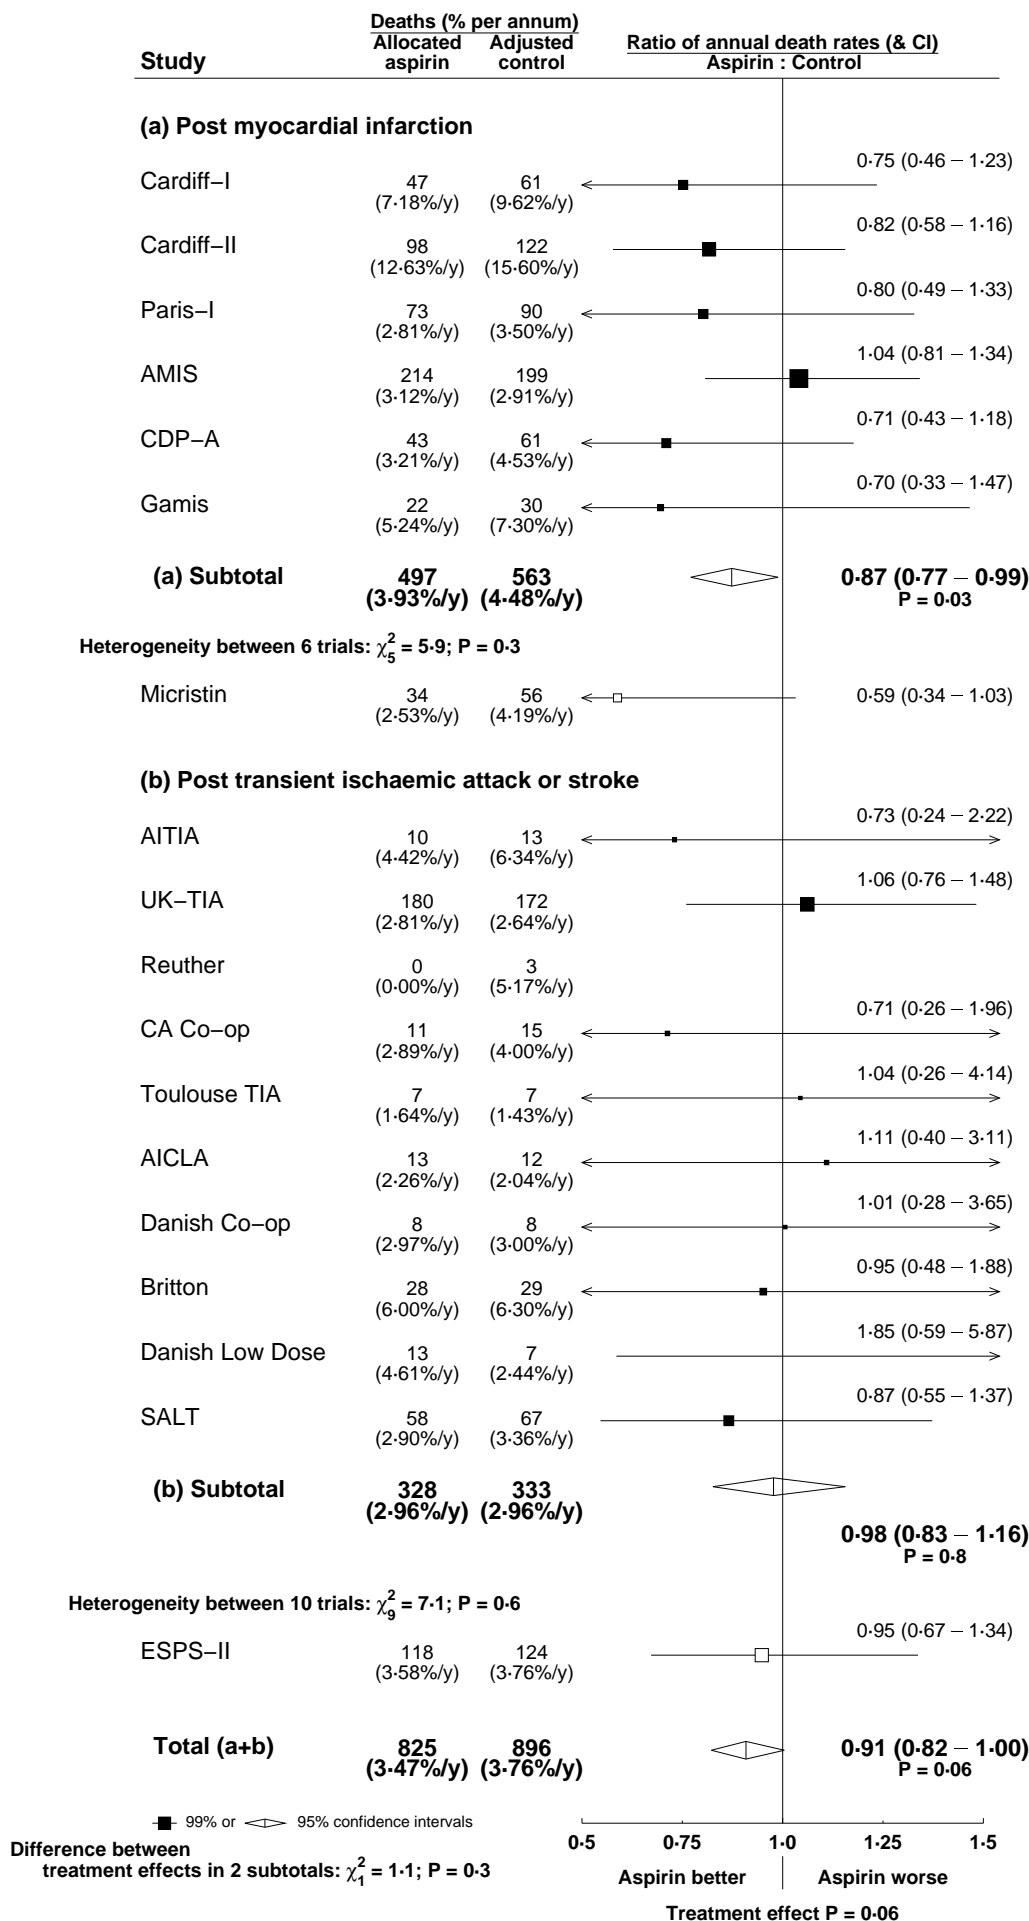

Open squares indicate trials for which only tabular data were available; these trials do not contribute to the subtotals or total.

**Web Figure 17: GASTRO-INTESTINAL BLEED (or other extracranial bleed) in secondary prevention trials, that reported at least one such event**

Symbols and conventions as in text - figure 2

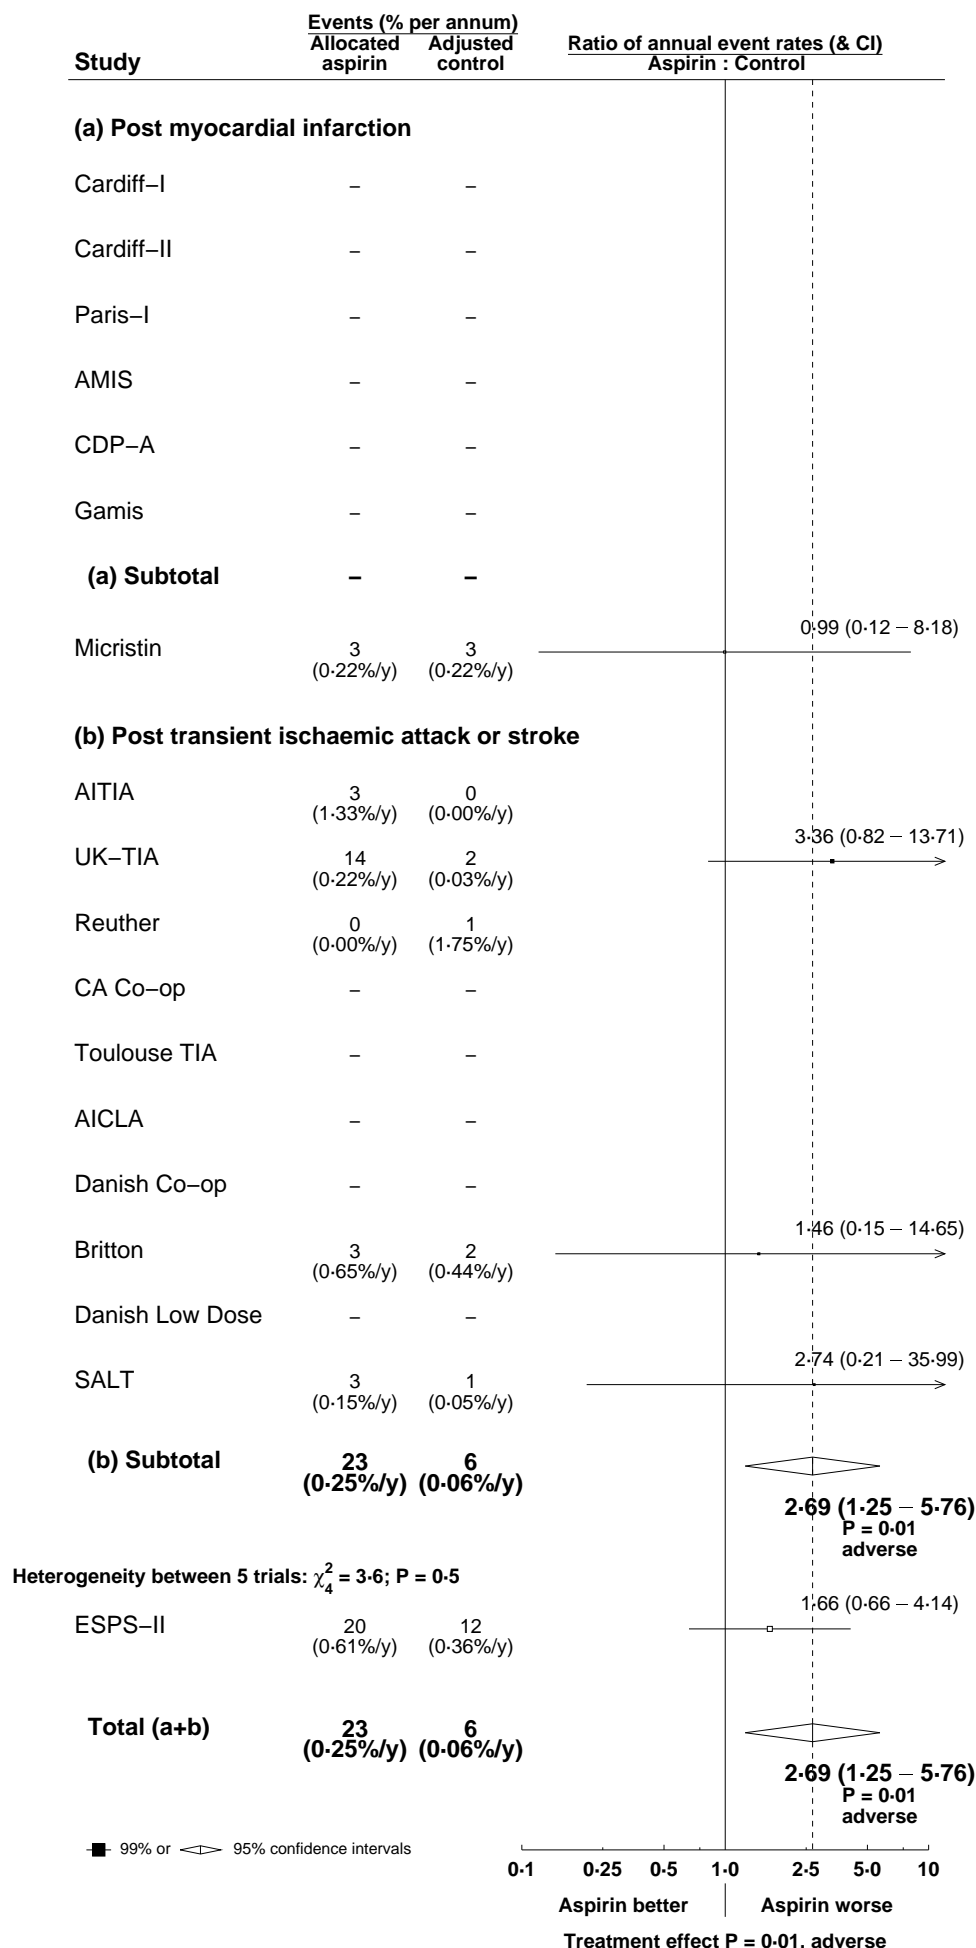

Open squares indicate trials for which only tabular data were available; these trials do not contribute to the subtotals or total.

**Web Figure 18: SERIOUS VASCULAR EVENTS in primary and secondary prevention trials by study**

Denominators are numbers of participants randomised and percentages are proportions with an event. For trials that randomised in a 2:1 ratio the control group is multiplied by two in the “adjusted control” column, but not in other calculations. Other conventions as in text - figure 2.

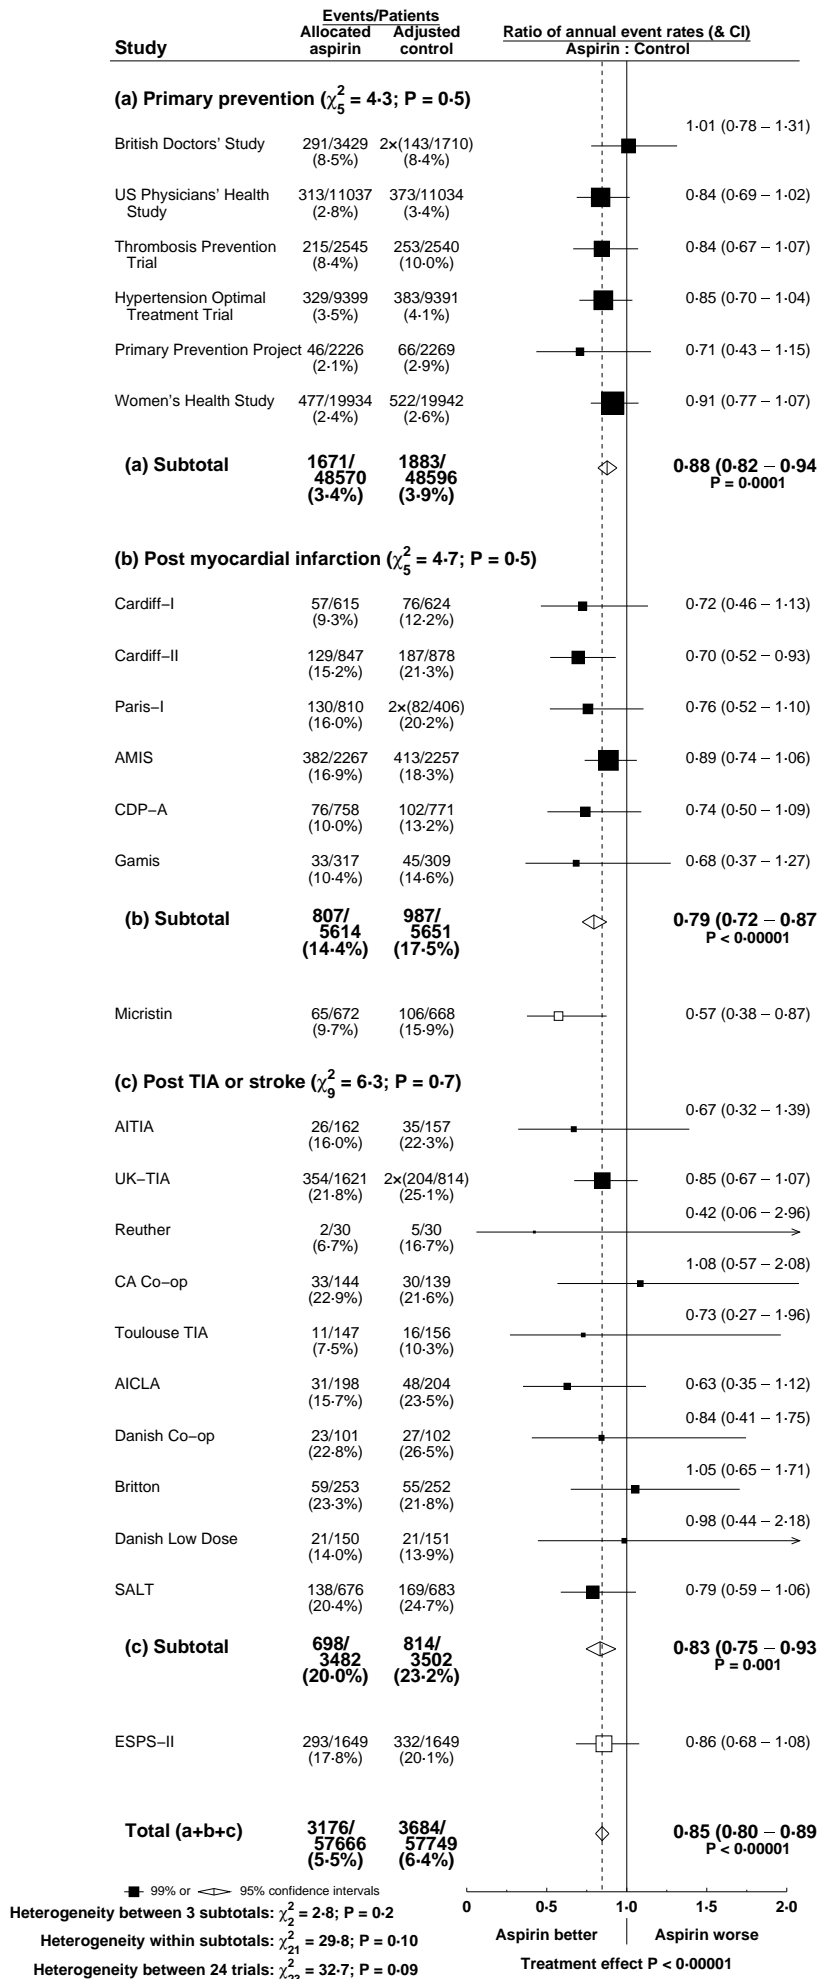

Open squares indicate trials for which only tabular data were available; these trials do not contribute to the subtotals or total.

**References for secondary prevention trials**

1. Elwood PC, Cochrane AL, Burr ML, Sweetnam PM, Williams G, Welsby E, et al. A randomized controlled trial of acetyl salicylic acid in the secondary prevention of mortality from myocardial infarction. *Br Med J* 1974; **1**: 436-40.
2. Elwood P. Trial of acetylsalicylic acid in the secondary prevention of mortality from myocardial infarction. *Br Med J (Clin Res Ed)* 1981; **282**: 481.
3. Elwood PC, Sweetnam PM. Aspirin and secondary mortality after myocardial infarction. *Lancet* 1979; **314**: 1313-5.
4. Elwood PC, Sweetnam PM. Aspirin and secondary mortality after myocardial infarction. *Circulation* 1980; **62**: V53-8.
5. Persantine-Aspirin Reinfarction Study (PARIS) Research Group. Persantine and aspirin in coronary heart disease. *Circulation* 1980; **62**: 449-61.
6. Persantine-Aspirin Reinfarction Study (PARIS) Research Group. The Persantine-aspirin reinfarction study. *Circulation* 1980; **62**: V85-8.
7. Aspirin Myocardial Infarction Study (AMIS) Research Group. AMIS: a randomized controlled trial of aspirin in persons recovered from myocardial infarction. *JAMA* 1980; **243**: 661-9.
8. Aspirin Myocardial Infarction Study (AMIS) Research Group. AMIS: the aspirin myocardial infarction study: final results. *Circulation* 1980; **62** (Suppl V): 79-84.
9. Coronary Drug Project (CDP) Research Group. The coronary drug project: design, methods and baseline results. *Circulation* 1973; **47** (Suppl 1): 1-49.
10. Coronary Drug Project (CDP) Research Group. Aspirin in coronary heart disease. *J Chronic Dis* 1976; **29**: 625-42.
11. Coronary Drug Project (CDP) Research Group. Aspirin in coronary heart disease. *Circulation* 1980; **62** (Suppl V): 59-62.
12. Uberla, K. Multicenter two years prospective study on the prevention of secondary myocardial infarction by ASA in comparison with phenprocoumon and placebo. In: Acetylsalicylic acid in cerebral ischaemia and coronary heart disease. Breddin K, Dorndorf W, Loew D, Marx R, ed. Stuttgart: Schattauer, 1978: 159-69.
13. Bousser MG, Eschwege E, Haguenu M, Lefauconnier JM, Thibult N, Touboul D, et al. "AICLA" controlled trial of aspirin and dipyridamole in the secondary prevention of athero-thrombotic cerebral ischemia. *Stroke* 1983; **14**: 5-14.
14. Vogel G, Fischer C, Huyke R. Reinfarktprophylaxe mit azetylsalizylsaure. *Folia Haematol (Leipz)* 1979; **106**: 797-803.
15. Fields WS, Lemak NA, Frankowski RF, Hardy RJ. Controlled trial of aspirin in cerebral ischemia. *Stroke* 1977; **8**: 301-14.
16. Fields WS, Lemak NA, Frankowski RF, Hardy RJ. Controlled trial of aspirin in cerebral ischemia. Part II: surgical group. *Stroke* 1978; **9**: 309-19.
17. Lemak NA, Fields WS, Gary HEJ. Controlled trial of aspirin in cerebral ischemia: an addendum. *Neurology* 1986; **36**: 705-10.
18. Britton M, Helmers C, Samuelsson K. High-dose acetylsalicylic acid after cerebral infarction - a Swedish cooperative study. *Stroke* 1987; **18**: 325-34.
19. Canadian Cooperative Study Group. A randomised trial of aspirin and sulphinyprazone in threatened stroke. *N Engl J Med* 1978; **299**: 53-9.



20. Whisnant JP, Matsumoto N, Elveback LR. The Canadian trial of aspirin and sulphinpyrazone in threatened stroke. *Am Heart J* 1980; **99**:129-30.
21. Gent M, Barnett HJ, Sackett DL, Taylor DW. A randomized trial of aspirin and sulfinpyrazone in patients with threatened stroke. Results and methodologic issues. *Circulation* 1980; **62**: V97-105.
22. Boysen G, Sorensen PS, Juhler M, Andersen AR, Boas J, Olsen JS, et al. Danish very-low-dose aspirin after carotid endarterectomy trial. *Stroke* 1988; **19**: 1211-5.
23. Sorensen PS, Pedersen H, Marquardsen J, Petersson H, Heltberg A, Simonsen N, et al. Acetylsalicylic acid in the prevention of stroke in patients with reversible cerebral ischemic attacks. A Danish cooperative study. *Stroke* 1983; **14**: 15-22.
24. Reuther R, Dorndorf W. Aspirin in patients with cerebral ischemia and normal angiograms or non-surgical lesions. In: Acetylsalicylic acid in cerebral ischemia and coronary heart disease. Breddin K, Dorndorf W, Loew D, Marx R, ed. Stuttgart: Schattauer; 1978: 97-106.
25. SALT Collaborative Group. Swedish aspirin low-dose trial (SALT) of 75 mg aspirin as secondary prophylaxis after cerebrovascular ischaemic events. *Lancet* 1991; **338**: 1345-9.
26. UK-TIA Study Group. United Kingdom transient ischaemic attack (UK-TIA) aspirin trial: interim results. *BMJ* 1988; **296**: 316-20.
27. UK-TIA Study Group. The United Kingdom transient ischaemic attack (UK-TIA) aspirin trial: final results. *J Neurol Neurosurg Psychiatr* 1991; **54**: 1044-54.
28. Guiraud-Chaumeil B, Rascol A, David J, Boneu B, Clanet M, Bierme R. Prévention des récurrences des accidents vasculaires cérébraux ischémiques par les anti-agrégants plaquettaires. *Rev Neurol (Paris)* 1982; **138**: 367-85.
29. ESPS 2 Group. European stroke prevention study. 2. Efficacy and safety data. *J Neurol Sci* 1997; **151**(Suppl): S1-77.

## Statistical Appendix

### Estimating the event rate ratio associated with baseline prognostic factors for selected major outcomes among the 94 000 people without prior vascular disease at baseline (see table 3 and webtable 3)

Among patients without prior vascular disease, the event rate ratio for selected major outcomes (serious vascular event; non-fatal MI; CHD death; major coronary event; probable ischaemic stroke; haemorrhagic stroke; total stroke and major gastrointestinal [or other extracranial] bleed) associated with baseline prognostic factors was modelled as follows. For patient  $i$  in study  $j$  receiving treatment  $k$  (where  $k=0$  corresponds to placebo and  $k=1$  corresponds to aspirin), let  $Y_{ijk}$  denote the occurrence or otherwise for that patient of the outcome under consideration during the trial, and let  $T_{ijk}$  denote the number of years of follow-up. The logarithm of the expected annual event rate was modelled through the Poisson regression model:

$$\ln \left( \frac{E(Y_{ijk})}{T_{ijk}} \right) = \alpha_j + (\mathbf{x}_{ijk} - \bar{\mathbf{x}}_{j0})' \boldsymbol{\beta}$$

where  $\alpha_j$  is the average (log) annual event rate observed in the placebo group in study  $j$ ,  $\mathbf{x}_{ijk}$  is the vector of baseline characteristics for patient  $i$  in study  $j$  (including an indicator variable corresponding to randomisation to aspirin),  $\bar{\mathbf{x}}_{j0}$  is the vector of mean baseline risk exposure levels observed among the placebo patients in study  $j$ , and  $\boldsymbol{\beta}$  is the vector of regression coefficients (including a regression coefficient associated with aspirin allocation). In addition to aspirin allocation, the baseline prognostic factors included in each model were: age (per decade); male gender; history of diabetes; cigarette smoking status (current vs ex/never); total cholesterol (per 1 mmol/L); the average of systolic and diastolic blood pressure (per 20 mmHg) and body mass index (per 5 kg/m<sup>2</sup>). Missing values of baseline characteristics were imputed based on the study-specific average levels in the placebo group  $\bar{\mathbf{x}}_{j0}$ . For the British Doctors' Study, in which total cholesterol was not available, the mean value across all the other trials was used.

### Separating individuals at “very low”, “low”, “moderate” and “high” predicted risk of a major coronary event for the analysis in figure 7, and the subgroup analyses (figure 2 and the corresponding webfigures [1, 4, 5 & 7])

For major coronary events, the log event rate ratios  $\boldsymbol{\beta}$  described above were re-estimated based on the 47 000 patients in the control groups only (so patients allocated aspirin and the term associated with aspirin allocation were removed). These log event rate ratios (which were similar to those estimated among all participants) were then used in conjunction with the estimated average (log) annual event rates  $\hat{\alpha}_1, \dots, \hat{\alpha}_6$  in the six trials to predict the average 5-yearly major coronary event risk  $P_{ijk}$  that would be expected in the absence of aspirin use, where

$$P_{ijk} = 100 \times (1 - (1 - e^{\eta_{ijk}})^5)$$

and

$$\eta_{ijk} = \hat{\alpha}_j + (\mathbf{x}_{ijk} - \bar{\mathbf{x}}_{j0})' \hat{\boldsymbol{\beta}}$$

Individuals were categorised as “very low” (<2.5%), “low” (2.5-5%), “moderate” (5-10%), or “high” (≥10%) predicted 5-year risk of a major coronary event without aspirin on the basis of  $P_{ijk}$ . (Note that the regression model may have slightly overestimated risk in the small high risk group.) The proportional and absolute effects of aspirin allocation on specific endpoints was then estimated separately within each of these subgroups (as described in the main Statistical Methods section).
